# Supplementary material for: FIRRM/C1orf112 mediates resolution of homologous recombination intermediates in response to DNA interstrand crosslinks
Source: PubMed Central journal article supplement — Sci Adv. 2023 May 31;9(22):eadf4409. doi: 10.1126/sciadv.adf4409 (PMC10413679; doi:10.1126/sciadv.adf4409), 2023-05-31
Supplement: sciadv.adf4409_sm.pdf [file sciadv.adf4409_sm.pdf]

Supplementary Materials for

**FIRRM/C1orf112 mediates resolution of homologous recombination intermediates in response to DNA interstrand crosslinks**

Abdelghani Mazouzi *et al.*

Corresponding author: Jos Jonkers, [j.jonkers@nki.nl](mailto:j.jonkers@nki.nl); Thijn R. Brummelkamp, [t.brummelkamp@nki.nl](mailto:t.brummelkamp@nki.nl)

*Sci. Adv.* **9**, eadf4409 (2023)  
DOI: 10.1126/sciadv.adf4409

**The PDF file includes:**

Figs. S1 to S14  
Tables S3 to S7  
Legends for tables S1 and S2

**Other Supplementary Material for this manuscript includes the following:**

Tables S1 and S2

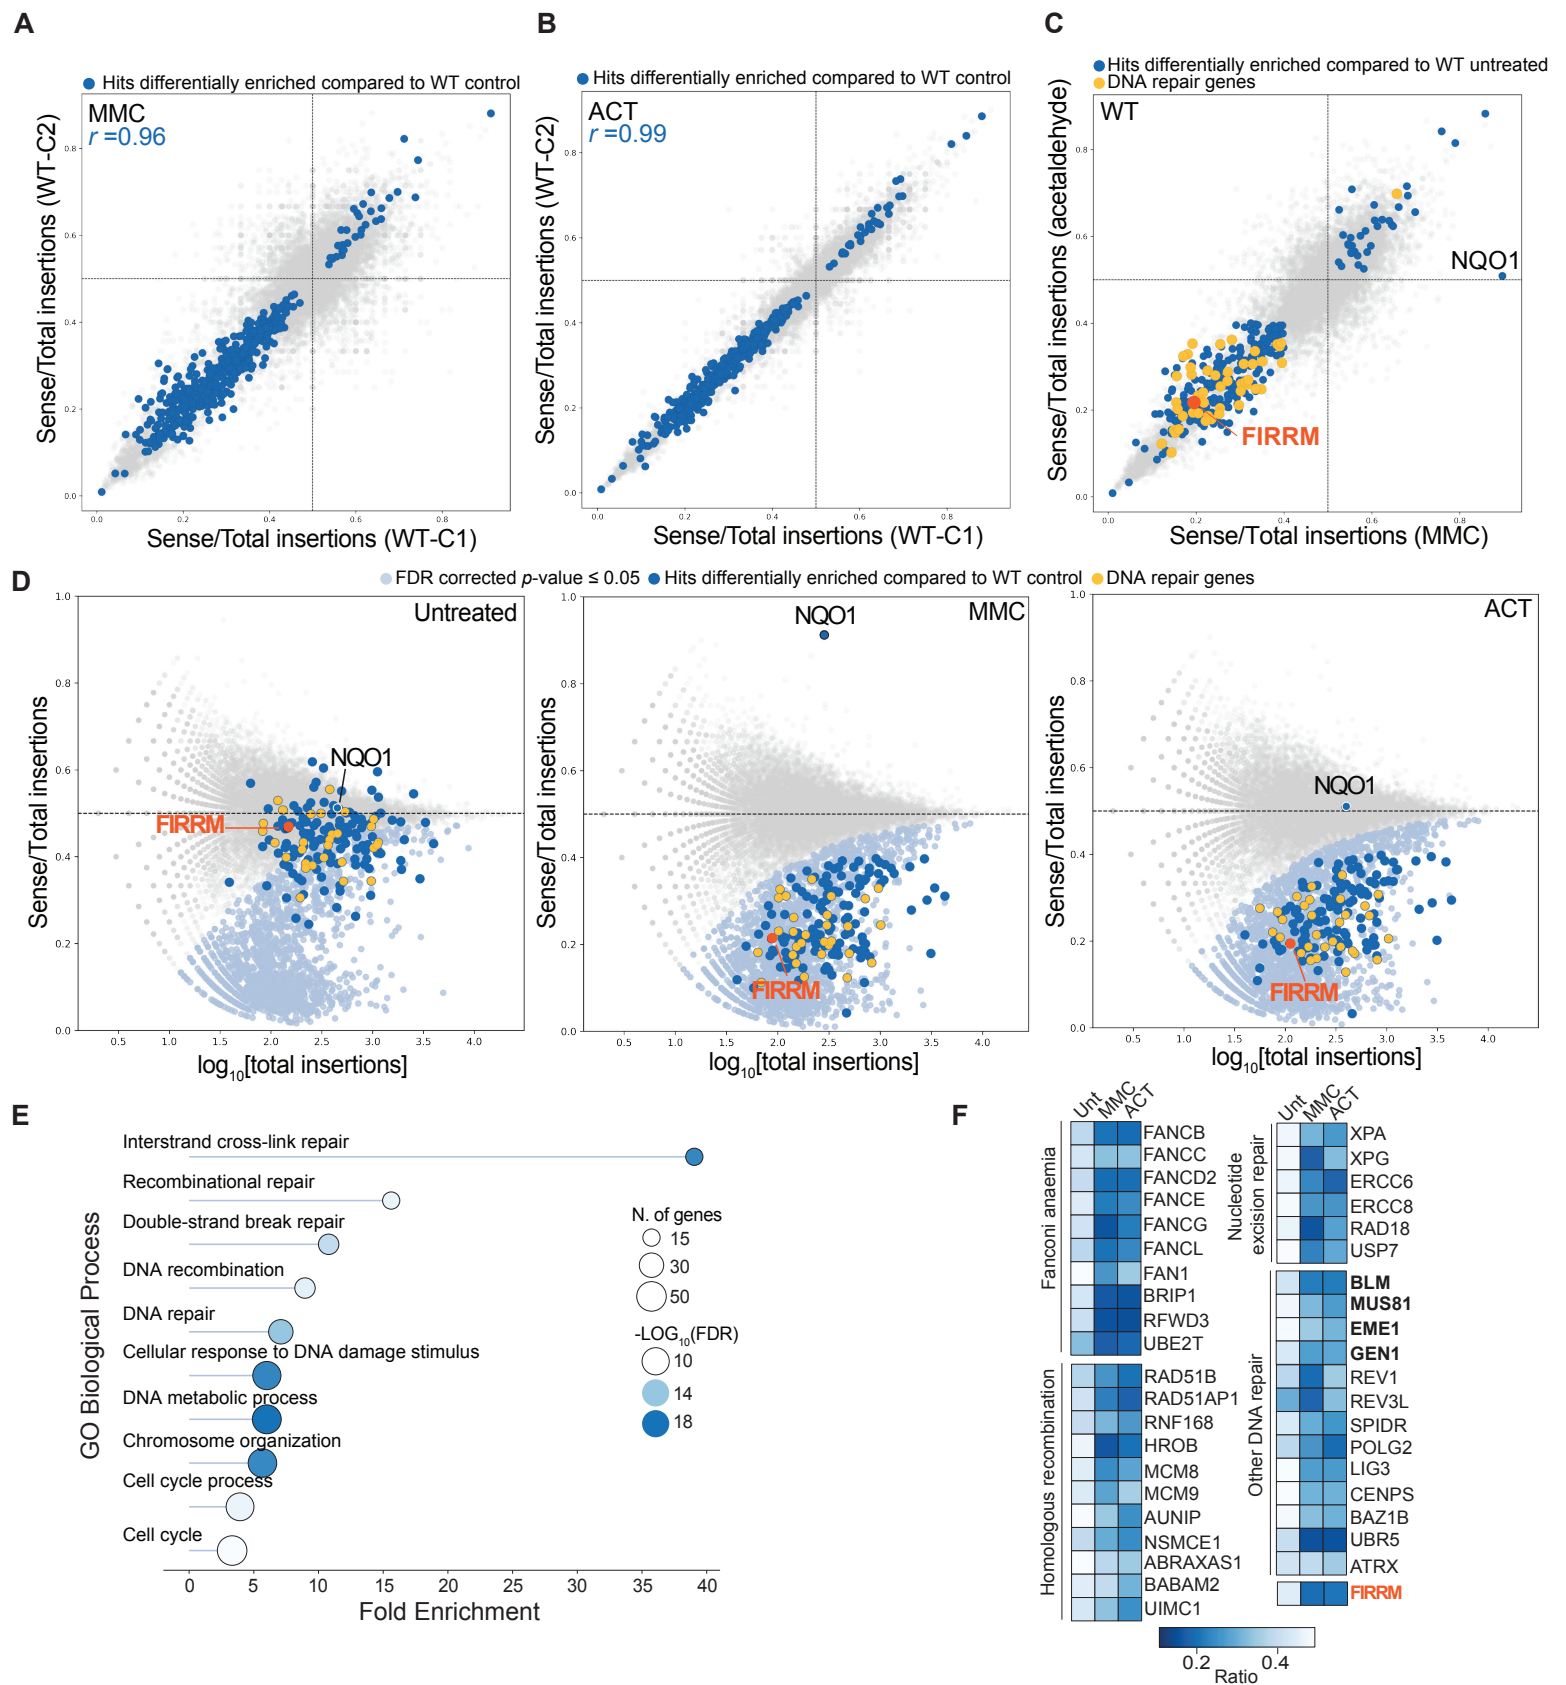



**Fig. S1. Synthetic lethality screens reveal important determinants of ICL sensitivity.** (A, B). Scatter plots of the ratios (sense/total insertions) for each gene upon MMC (A) or acetaldehyde (ACT) (B) treatment for wild-type clone 1 compared to clone 2. (C) Scatter plot of the ratios (sense/total insertions) for each gene upon mitomycin C (MMC) treatment compared to acetaldehyde (ACT). Genes that are differentially regulated compared to the wild-type untreated are depicted in dark blue and the DNA repair genes are highlighted in orange. (D) Fishtail plot depicting the ratios (sense/total insertions) for each gene in untreated, MMC and acetaldehyde treatment in wild-type HAP1 cells (y-axis) and the total number of insertions in the respective gene (x-axis). (E) Gene Ontology (GO) terms of the commonly identified genes in MMC and acetaldehyde survival screens. (F) Heatmap showing the DNA repair genes that were identified in (C, D) (labelled in orange).

**A**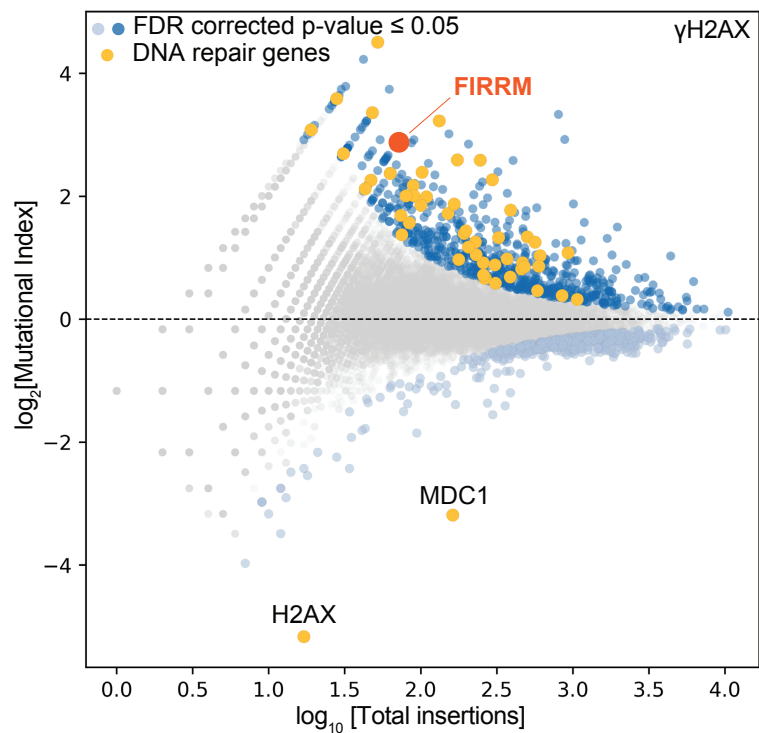**B**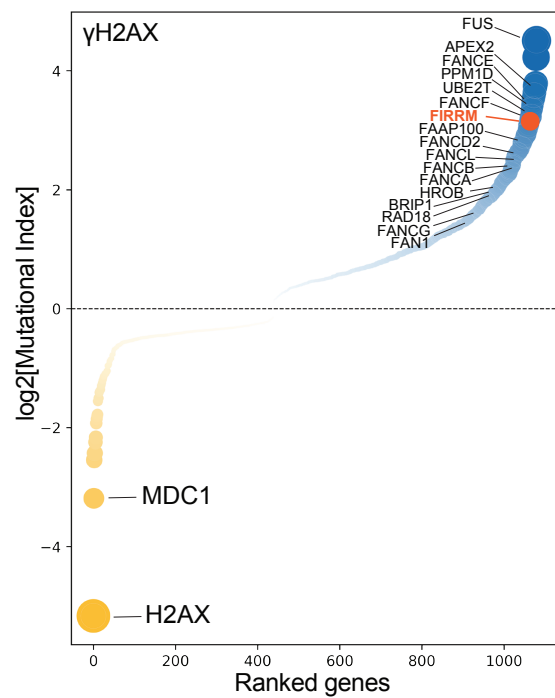

**Fig. S2. FACS-based genetic screen for  $\gamma$ H2AX identifies several key ICL repair factors including *FIRRM*.** (A) Fishtail plot of the FACS-based haploid genetic screen in S phase cells with low or high levels of  $\gamma$ H2AX. Y-axis displays the mutational index (MI) for each gene and x-axis shows the total number of insertions in the respective gene. Negative regulators are highlighted in dark blue and positive regulators are depicted in light blue. DNA repair genes are highlighted in orange. (B) Ranking plot depicting the genes significantly enriched or depleted in the  $\gamma$ H2AX populations, positive regulators are colored in orange and negative regulators are depicted in blue and ranked according to the mutational index (MI) (FDR corrected  $p \leq 0.05$ ).

### A MMC Survival screen

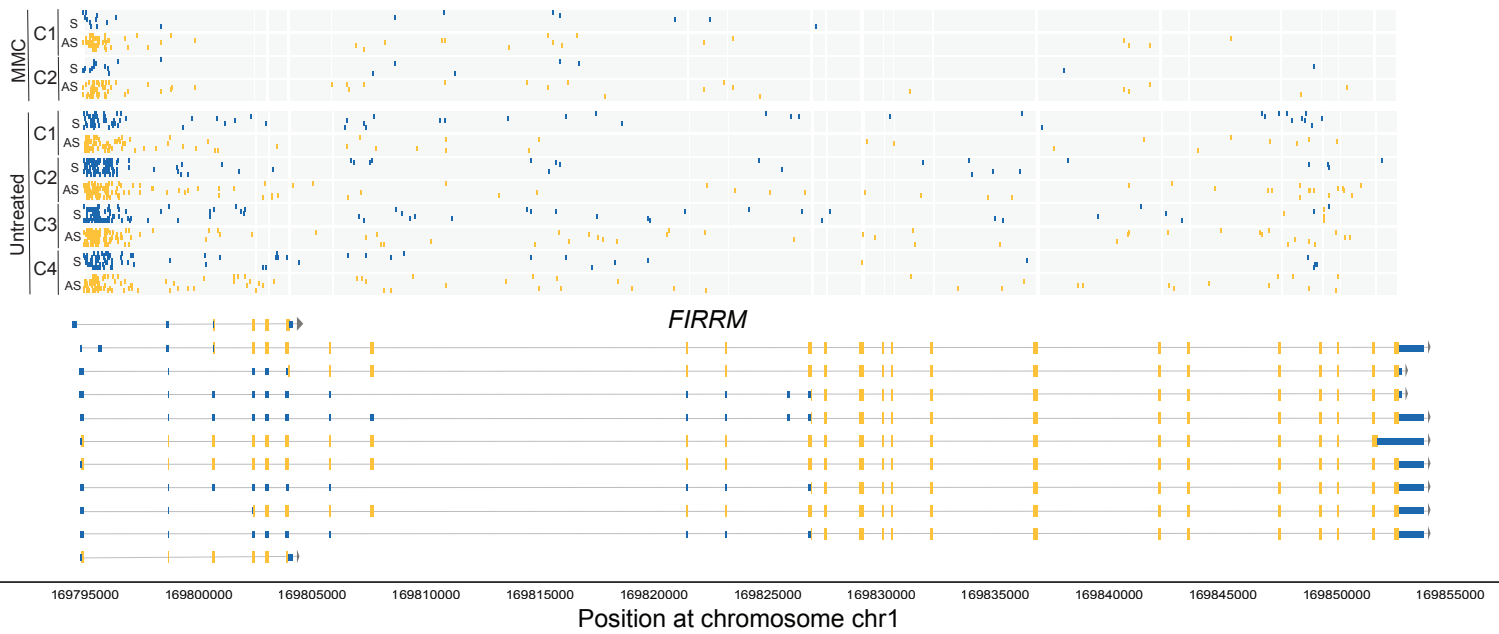

### B $\gamma$ H2AX screen

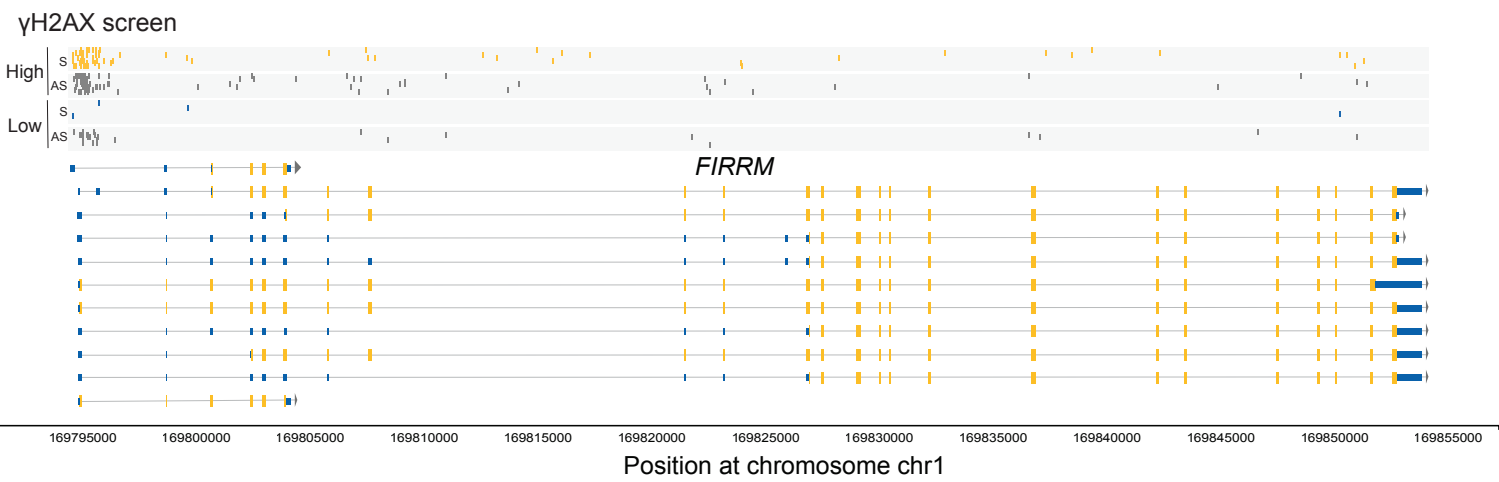

### C

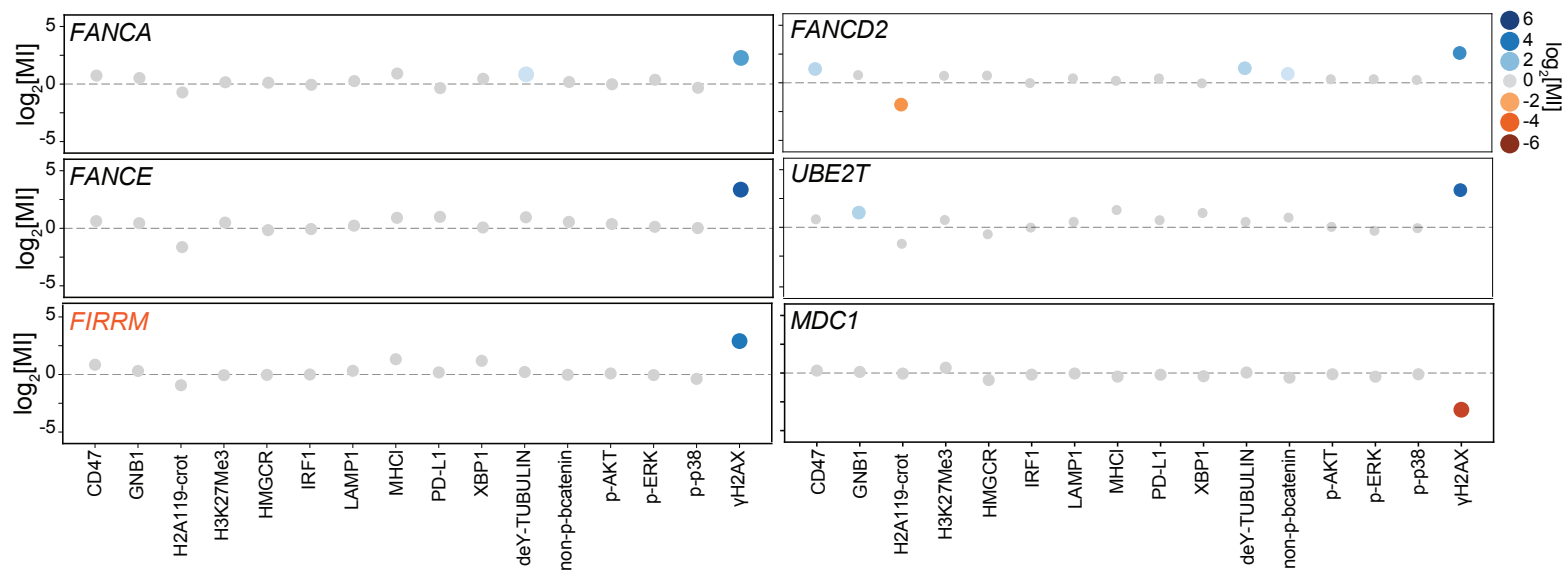

**Fig. S3. Insertional mutagenesis patterns for *FIRRM* in the performed genetic screens. (A, B),** Gene-trap insertions identified within the *FIRRM* gene in the sense (S, blue) or antisense orientation (AS, orange) for the survival screens (Untreated vs MMC in 2 independent clones) (A) and the FACS-based genetic screen for  $\gamma$ H2AX (low vs high channel) (B). (C) Mutational index (MI) of *FIRRM*, examples of Fanconi anemia genes and *MDC1* plotted across  $\gamma$ H2AX and 16 other screens that were previously performed using haploid genetic screens (blue, negative regulator; orange, positive regulator; grey, not significant).

**A**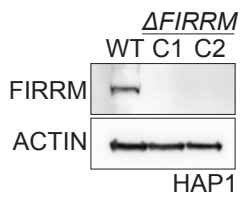**B**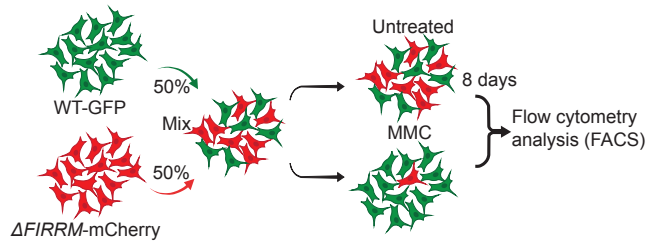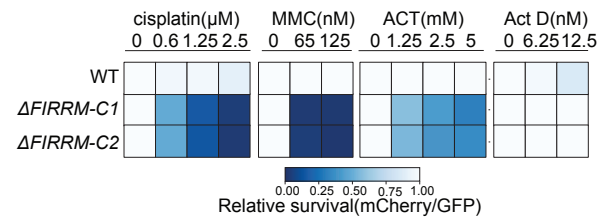**C**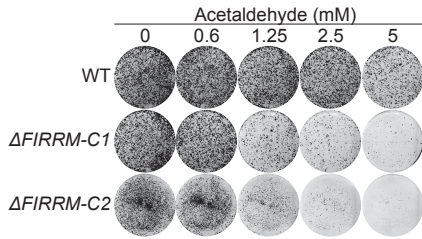**D**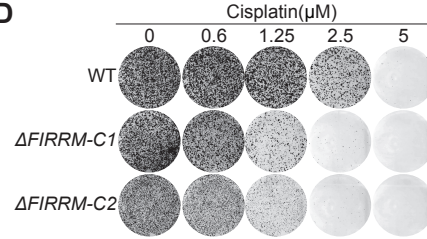**E**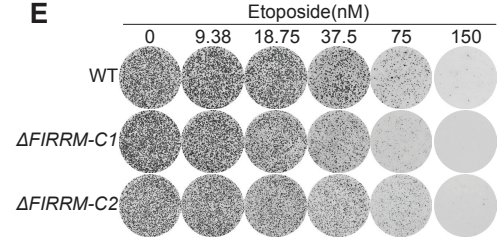**F**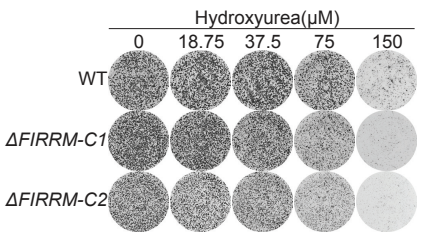**G**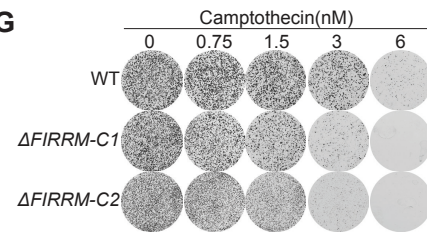**H**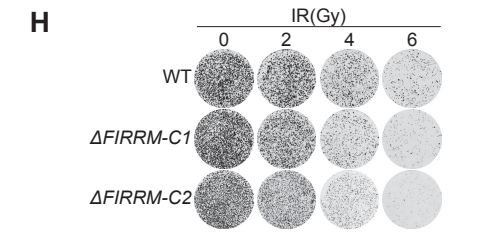**I**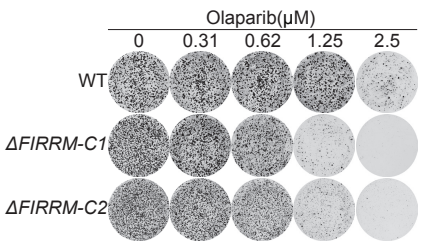**J**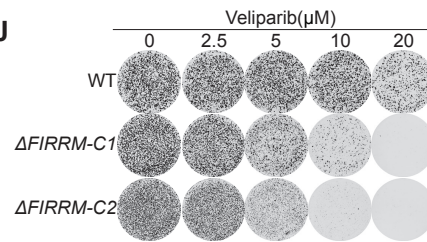**K**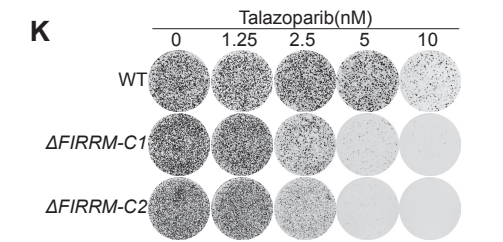

**Fig. S4. FIRRM deficiency causes hypersensitivity to ICL-inducing agents and PARP inhibitors.** (A) Immunoblot using an antibody against FIRRM in wild-type or *FIRRM* knockout HAP1 cells generated by CRISPR-mediated gene editing. ACTIN is used as a loading control. The FIRRM antibody recognizes a C terminal peptide located between the residues 694-774. (B) (left panel) Schematic representation of the competition growth assays performed in Fig. 1D. (right panel) Heatmap displaying the mean ratios (mCherry/GFP), normalized to untreated (n=3) of competition growth assays in wild-type (GFP) and  $\Delta$ *FIRRM* (mCherry) HAP1 cells treated with different DNA damaging agents for 8 days. Mitomycin C (MMC), acetaldehyde (ACT), actinomycin D (Act D). (C-K) Clonogenic survival of wild-type or *FIRRM* knockout HAP1 cell lines in response to different DNA damaging agents for 8 days. Representative scans of three independent replicates are displayed.



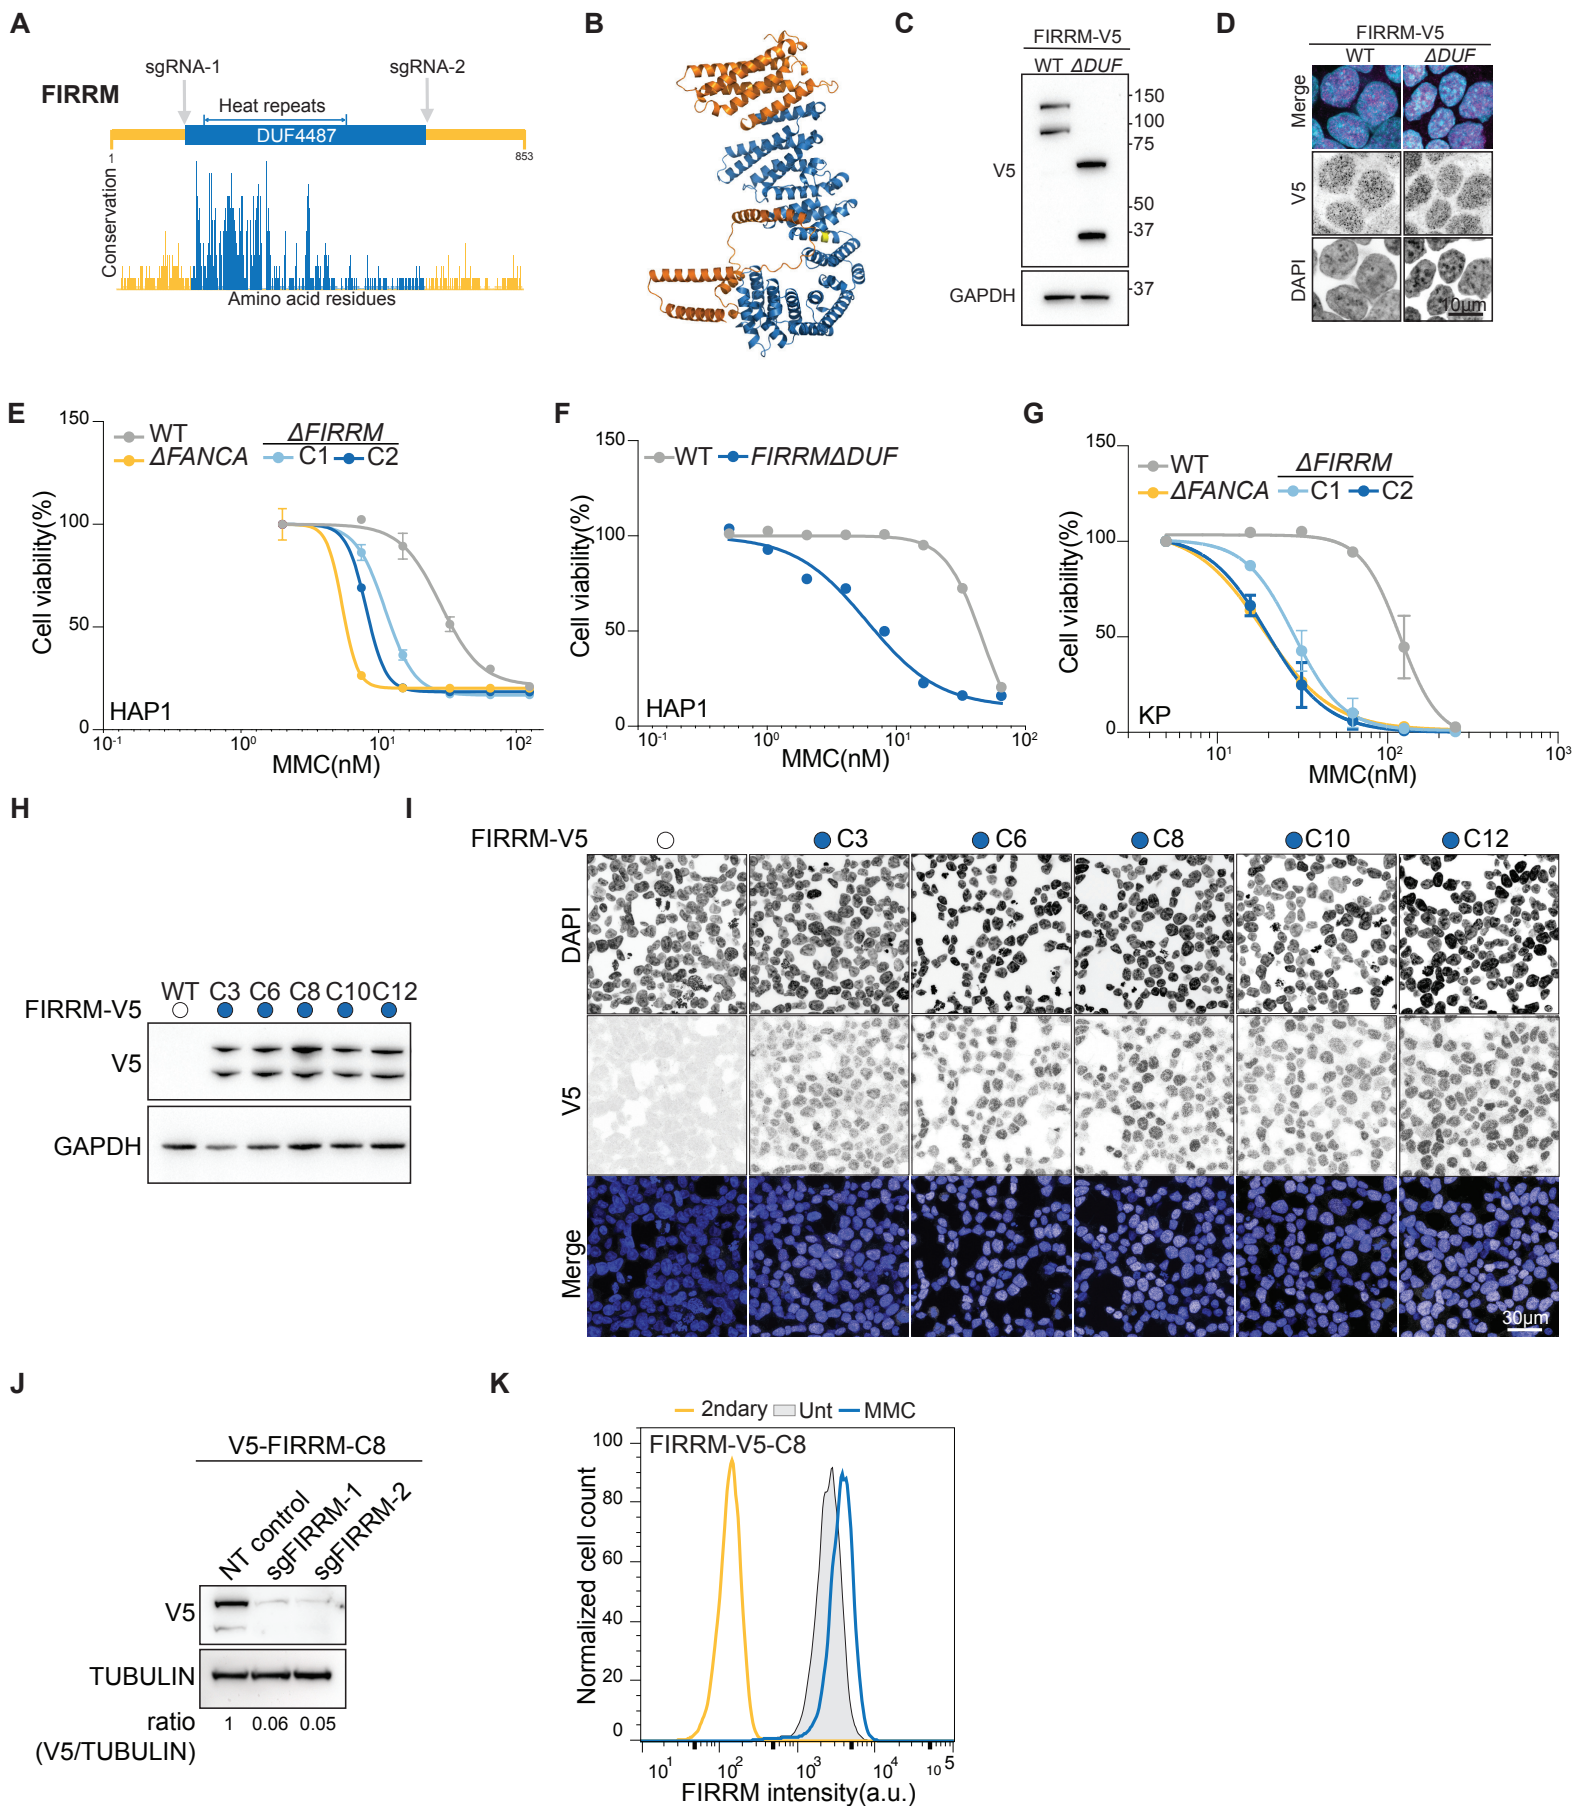

**Fig. S5. FIRRM deficient cells are exquisitely sensitive to MMC.** (A) Schematic depiction of the FIRRM domains and the degree of conservation. Arrows indicate the positions of the sgRNAs used to generate *FIRRMΔDUF* HAP1 cells. (B) Predicted structure of FIRRM using Alphafold2. N and C terminus is colored in orange, DUF domain is marked in blue. (C) Immunoblot depicting full length V5-tagged FIRRM and *FIRRMΔDUF* cells. (D) Immunofluorescent staining determining the localization of full-length and *FIRRMΔDUF* protein in HAP1 cells. (E) Quantification of clonogenic survival assays in HAP1 cells depicted in Fig. 1E. Data are mean  $\pm$  s.e.m, normalized to untreated,  $n=3$ . (F) Quantification of a colony formation assay in HAP1 cells carrying an endogenous V5-tag at the C-terminus of FIRRM (WT) or HAP1 cells lacking the DUF of FIRRM exposed to indicated concentrations of MMC for 8 days. Data are normalized to untreated and a representative of three biological replicates is shown. (G) Quantification of clonogenic survival assays in KP cells depicted in Fig. 1F. Data are mean  $\pm$  s.e.m, normalized to untreated,  $n=3$ . (H, I) Analysis of different clones with an endogenous V5-tag at the C-terminus of FIRRM in HAP1 cells. Clones were analyzed by immunoblotting (H) and immunofluorescence (I). (J) Immunoblotting using a V5 antibody against FIRRM-V5 in FIRRM-V5 tagged HAP1 cells infected with lentiviral vectors containing a non-targeting (NT) or a *FIRRM*-targeting sgRNA. TUBULIN is used as a loading control. (K) HAP1 cells with an endogenous V5-tag at the C-terminus of FIRRM were infected with a lentiviral vector containing a non-targeting sgRNA. These cells were then left untreated or treated with 50nM MMC before FACS analysis for FIRRM-V5 intensity was performed. This serves as a control for Fig.1G.

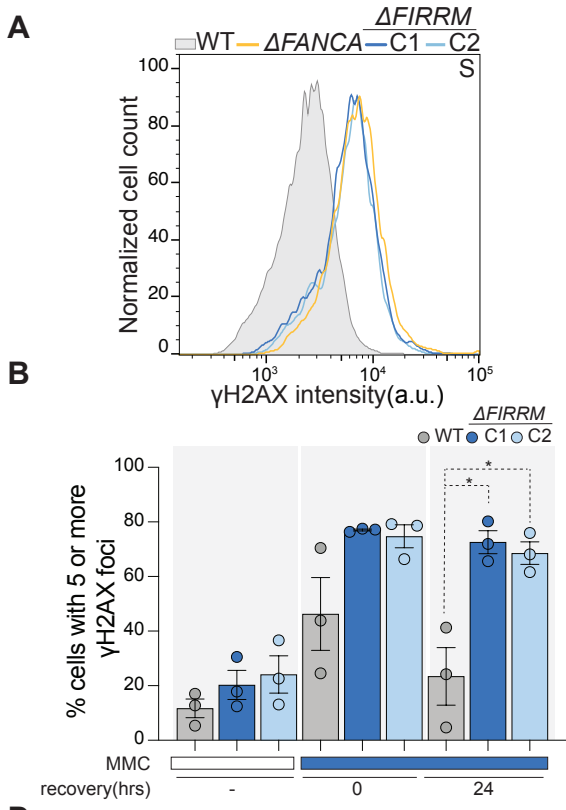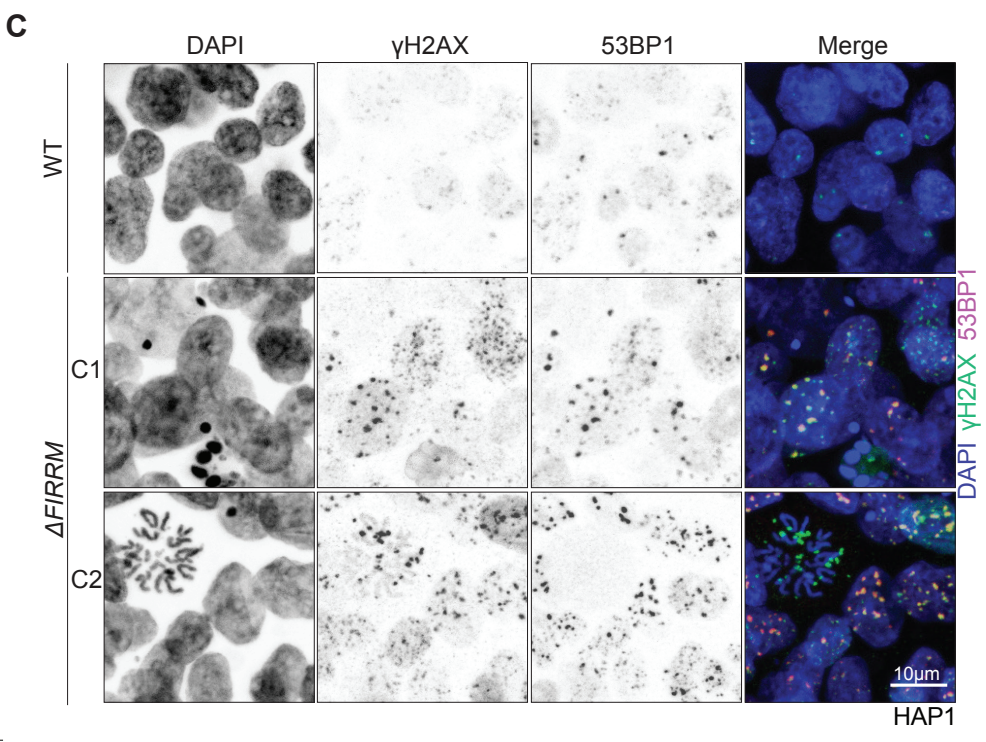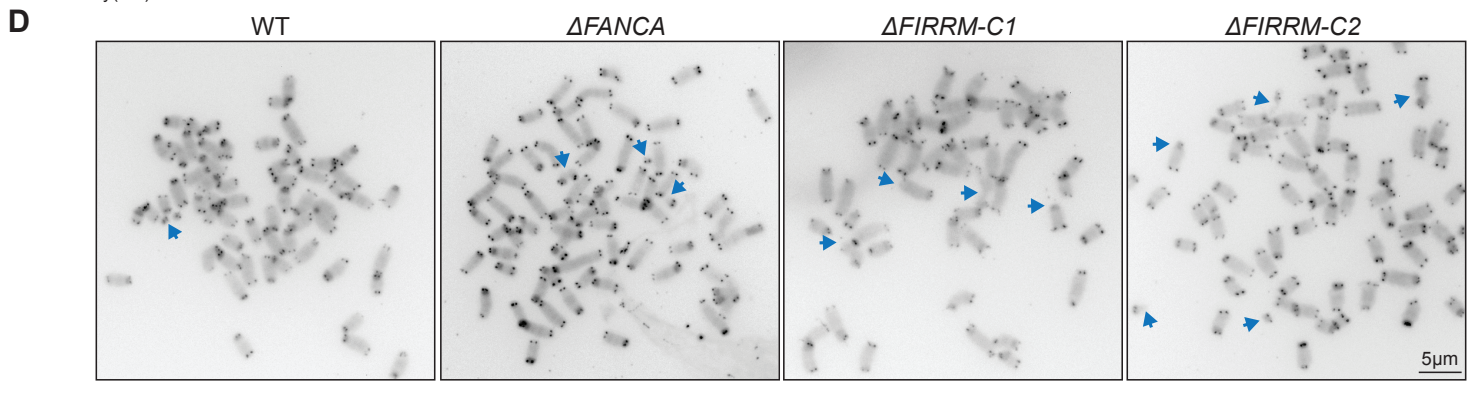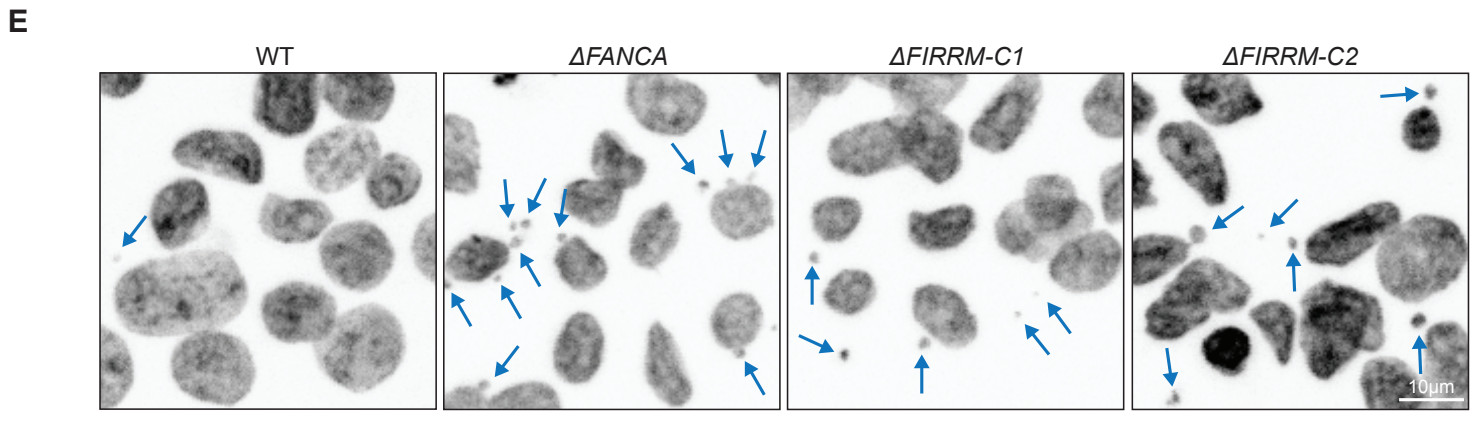

**Fig. S6. *FIRRM* knockout cells display elevated levels of  $\gamma$ H2AX.** (A)  $\gamma$ H2AX intensities of S phase cells derived from Fig. 2B. (B, C) Quantification (B) of  $\gamma$ H2AX foci in wild-type or *FIRRM* knockout HAP1 cells treated with MMC and recovered for the indicated time points. Values represent percentage of cells with 5 or more foci (mean of 3 biologically independent experiments). Representative images (C) depict cells at the 24 hour recovery time point. At least 200 cells were analyzed per condition in every experiment. *p* value was calculated by a two-tailed *t*-test, \* *p*<0.05. (D) Representative images of KP cells of indicated genotypes treated with 100nM MMC for 24 hours. Metaphase chromosomes were stained with DAPI and a telomeric FISH probe. Arrows depict chromosomal aberrations detected in individual spreads. At least 30 metaphase spreads were analyzed per condition in a blinded fashion. Quantification is depicted in Fig. 2C. (E) Images show micronuclei formation in HAP1 cells treated with 50nM MMC for 24 hours and released for an additional 24 hours. Quantification is presented in Fig. 2D. (D, E) Images are representative for three biological replicates.



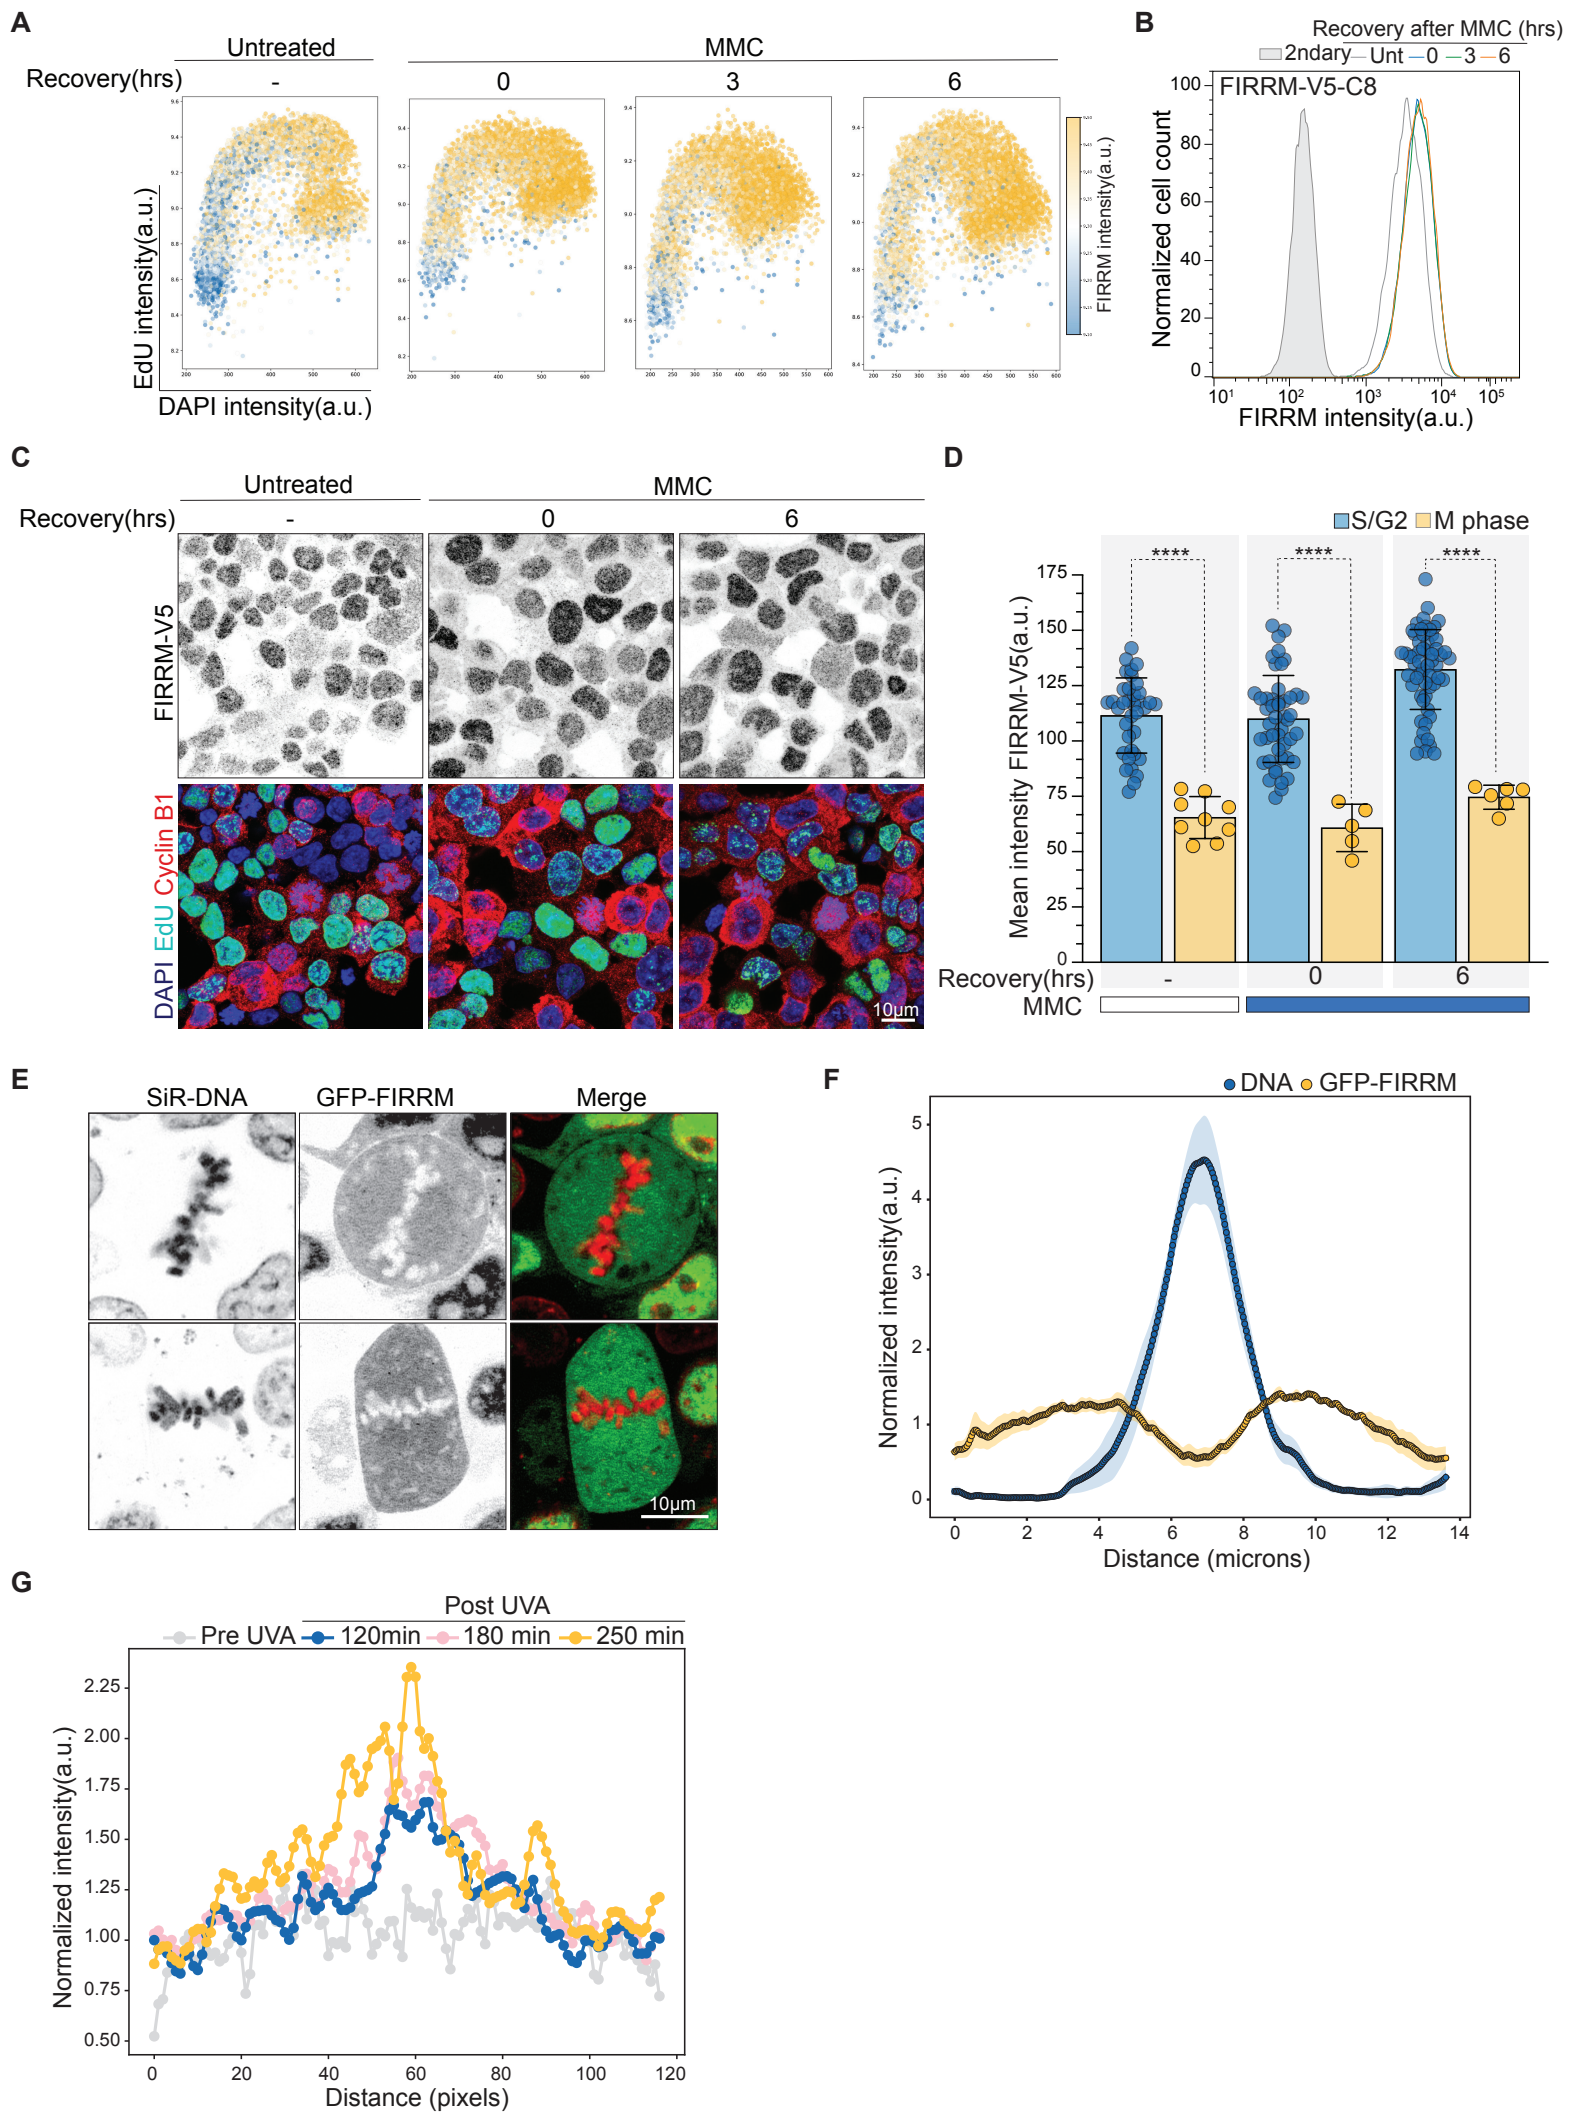

**Fig. S7. FIRRM expression and localization is cell-cycle regulated.** (A, B) Wild-type HAP1 cells with an endogenous V5-tag at the C-terminus of FIRRM were treated with 50nM MMC for 24 hours and left to recover for indicated times before FACS analysis for EdU, DAPI and FIRRM-V5 intensities was performed. FIRRM intensity during S phase is plotted in (B). (C, D) Representative images (C) and quantification (D) of FIRRM-V5 cells that were left untreated or exposed to 50nM MMC for 24 hours. After 0 or 6 hours of recovery, cells were stained for DAPI, EdU, Cyclin B1 and V5-FIRRM. Data are depicted as mean  $\pm$  s.d. significance was calculated by a two-tailed t-test. \*\*\*\*  $p < 0.0001$ . (E, F) Representative images (E) and quantification (F, n=8) of GFP-FIRRM localization to mitotic cells. DNA is labelled by SiR-DNA (red). Data are depicted as mean  $\pm$  sem. (G) Quantification of GFP-FIRRM recruitment to laser UVA micro-irradiation sites after psoralen treatment at the indicated time points in HAP1 cells, shown in Fig. 2F. The intensities are measured by drawing a line across the cells.

**A**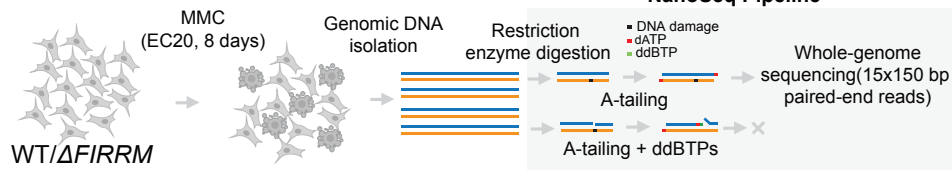**B**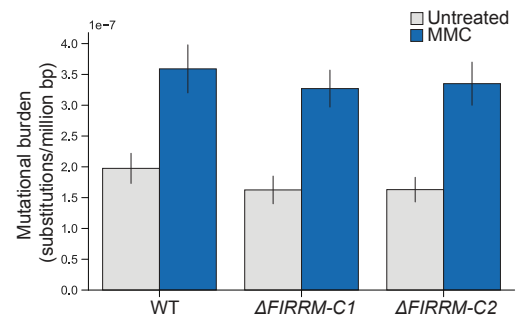**C**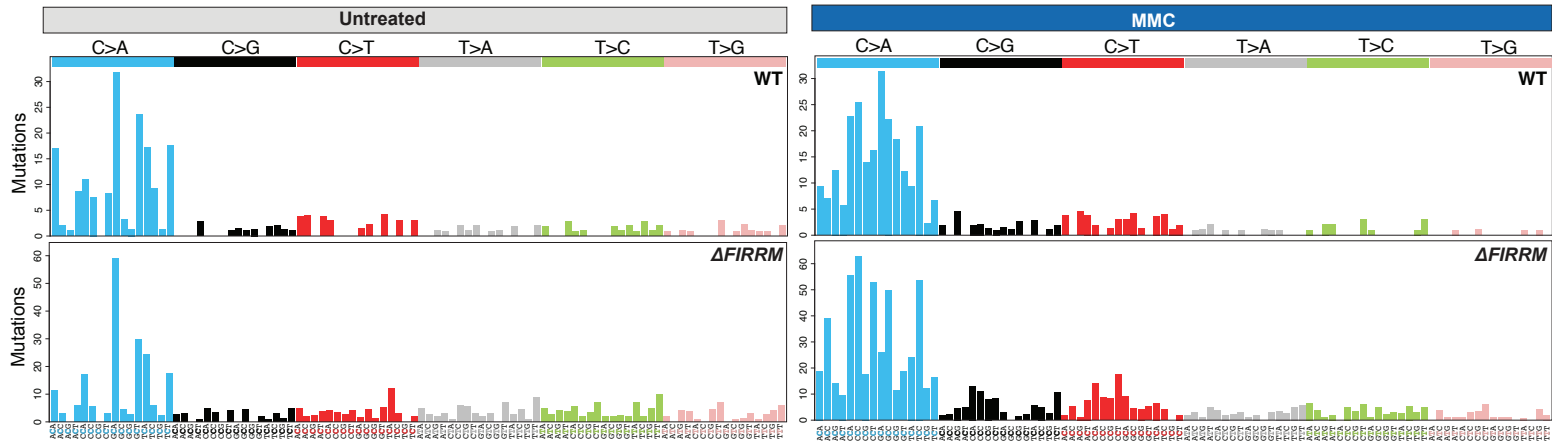**D**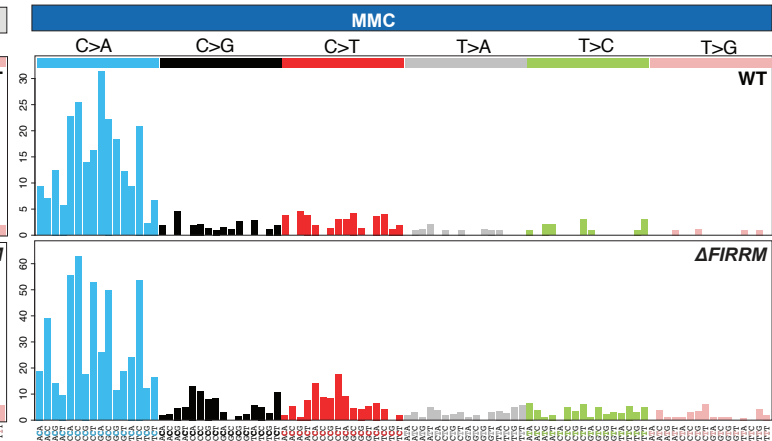**E**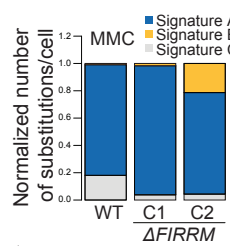**G**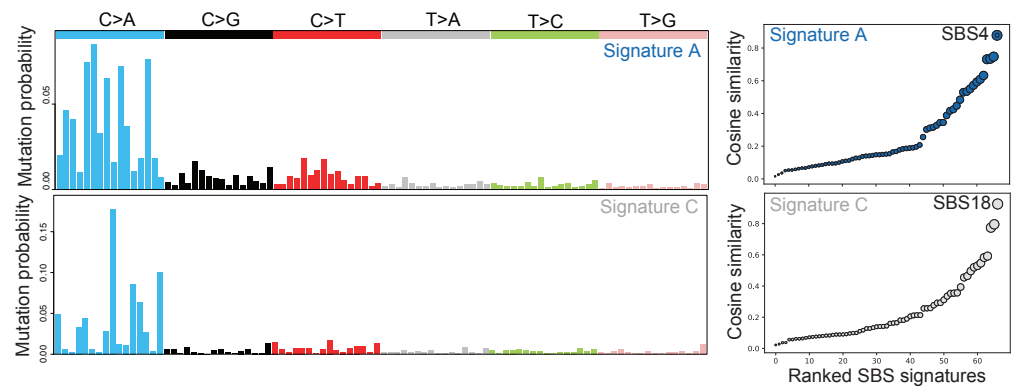**F**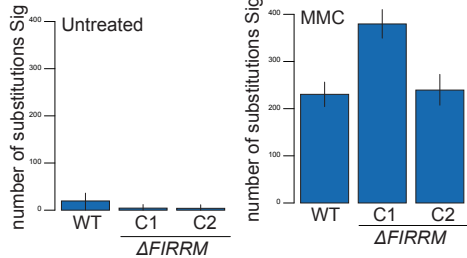**H**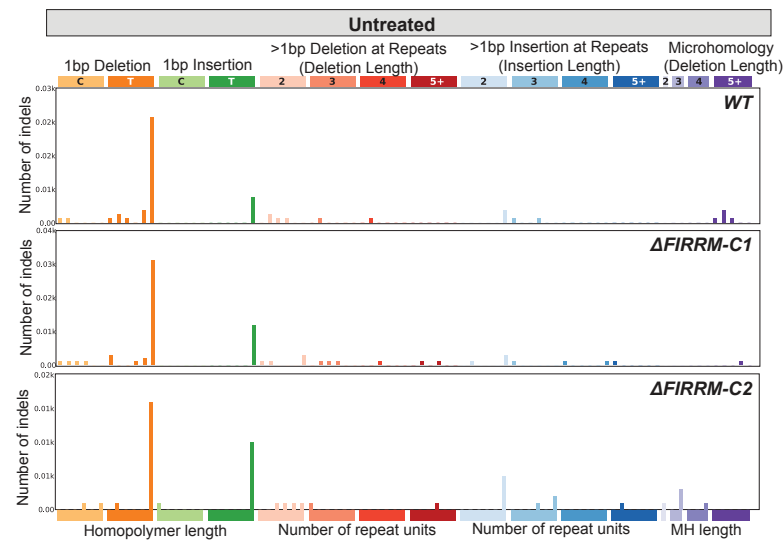**I**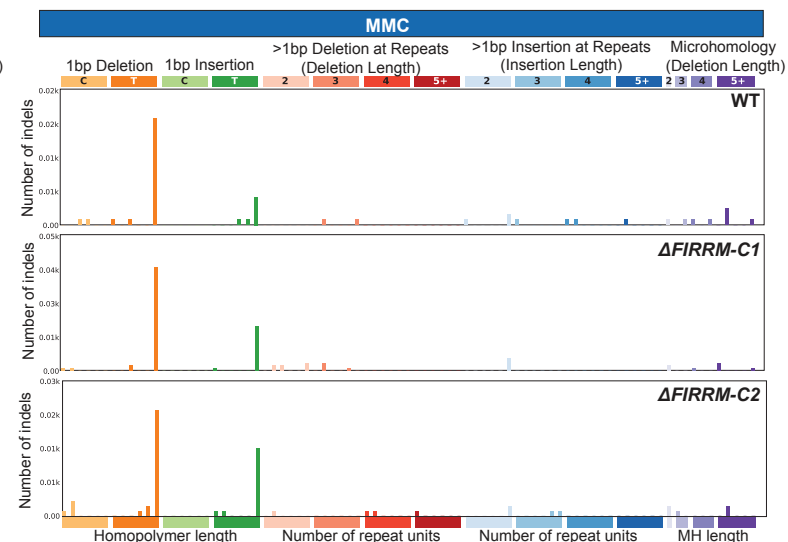



**Fig. S8. Mutational profiles of *FIRRM* knockout cells.** (A) Schematic overview of the NanoSeq workflow to determine the mutational signatures of  $\Delta$ *FIRRM* versus wild-type HAP1 cells. The detailed workflow is described in the Materials and Methods section. Briefly, HAP1 cells of indicated genotypes were passaged in the presence of an EC20 dose of MMC for 8 days or left untreated. Subsequently, genomic DNA was isolated and libraries were prepared as previously described by Abascal et al. (27). (B) Estimated mutational burden based on the number of substitutions detected in untreated and MMC-treated HAP1 cell lines. (C, D) Substitution profiles for wild-type and  $\Delta$ *FIRRM* cells in unchallenged (C) or MMC-treated conditions (D). (E) Contribution of signatures in wild-type and  $\Delta$ *FIRRM* cells upon 50nM MMC treatment for 7 days. (F) Contribution of MMC-related signature A in unchallenged or MMC treated conditions. (G) Signature decomposition of signatures A and C and cosine similarities comparing the identified patterns with existing signatures. (H, I) Indel spectra of WT and  $\Delta$ *FIRRM* HAP1 cells in unchallenged conditions (H) or upon MMC treatment (I).

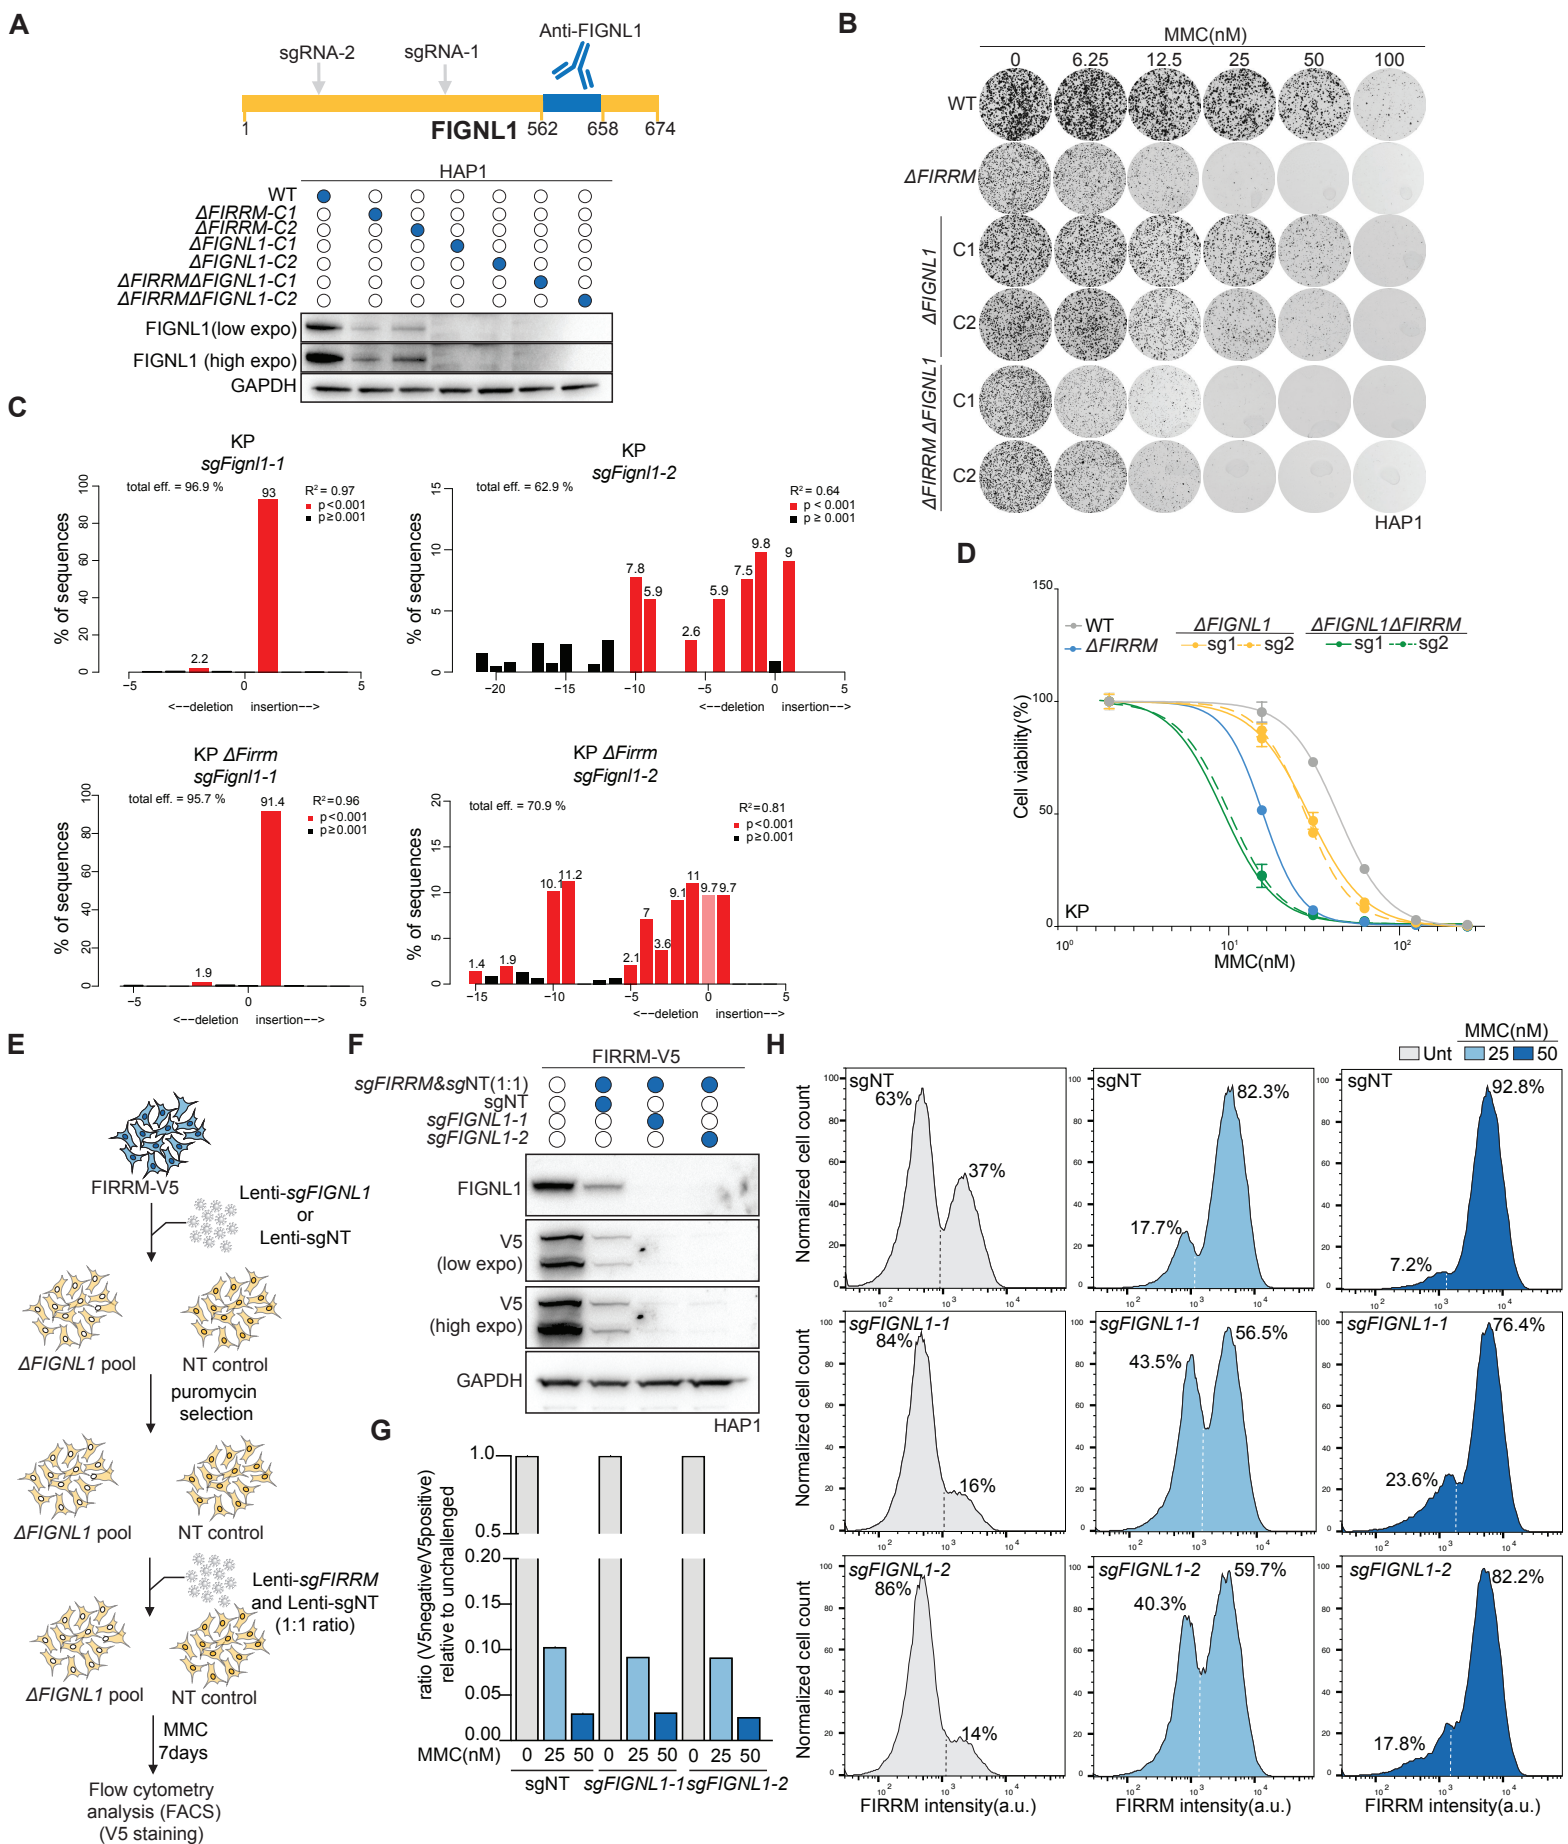

**Fig. S9. FIRRM functions independently of FIGNL1 during ICL repair.** (A) Schematic depiction of the sgRNAs and antibody targeting sites in FIGNL1 (top panel). Western blot in HAP1 cells of indicated genotypes to assess FIGNL1 protein levels. GAPDH was used as a loading control (bottom panel). (B) Clonogenic survival assay in response to different concentrations of MMC for wild-type, *FIRRM*, *FIGNL1* single or double knockouts in HAP1 cells. Quantification is shown in Fig. 4A. (C) Analysis of insertions and deletions in KP wildtype or *FIRRM* knockout cells transduced with non-targeting or sgRNAs targeting *Fignl1* using the Tracking of Indels by DEcomposition (TIDE) algorithm (44) . (D) Quantification of a colony formation assay performed in KP cells of indicated genotypes after various concentrations of MMC (Fig. 4B). Data are normalized to untreated, mean  $\pm$  s.e.m,  $n=2$  (E) Schematic representation of the experiment performed in fig. S9F to H. Briefly, FIRRM-V5-tagged cells were transduced with sgRNAs targeting FIGNL1 or a non-targeting (NT) control guide. After antibiotic selection, cells were transduced with a 1:1 mix of NT and *FIRRM* sgRNAs, exposed to indicated concentrations of MMC for 7 days and FIRRM-V5 levels were analyzed using flow cytometry. (F) Western blot of the cells generated in (E). (G to H) Quantification and representative FACS plots of the experiment described in (E),  $n=2$ .

**A**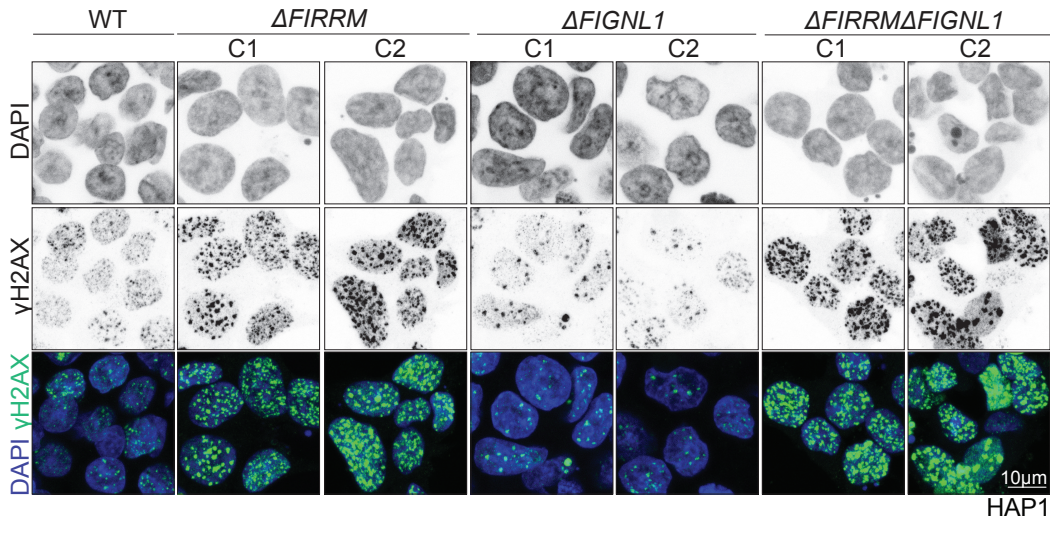**B**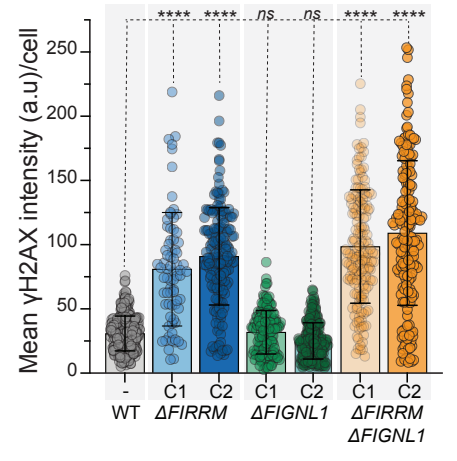

**Fig. S10: Loss of FIGNL1 does not increase DNA damage upon MMC exposure. (A, B)** Representative pictures (A) and quantification (B) of HAP1 wild type, two FIRRM knockout clones, two FIGNL1 knockout clones and two double knockout clones. Cells were treated with 50nM MMC for 24 hours, recovered for an additional 24 hours and were fixed and stained for  $\gamma$ H2AX and DAPI. Data are depicted as mean  $\pm$  s.d. significance was calculated by a two-tailed t-test. ns not significant, \*\*\*\*  $p < 0.0001$ .

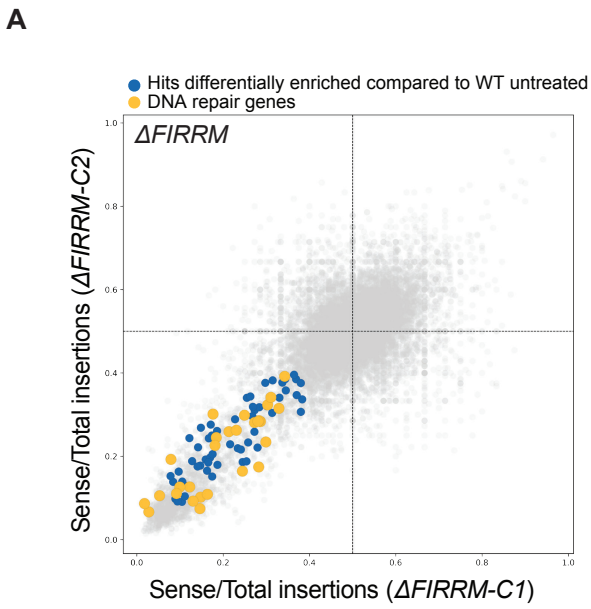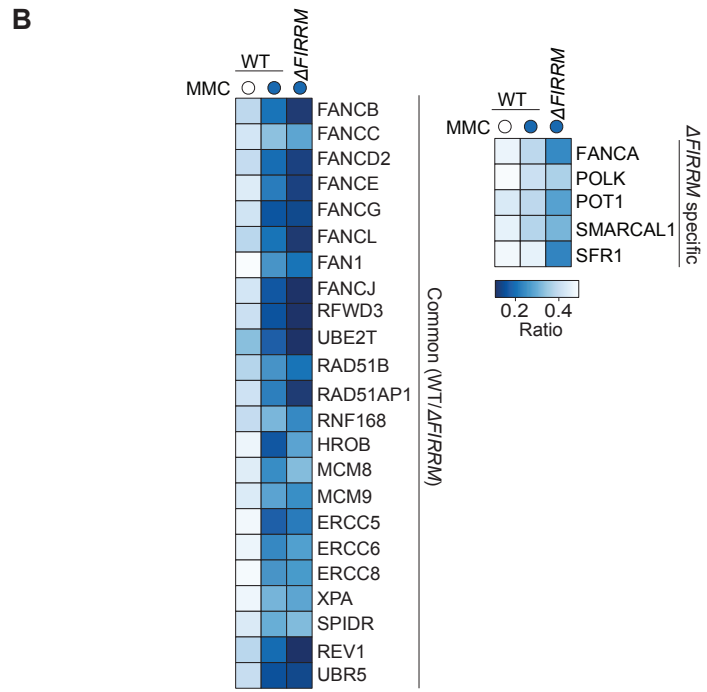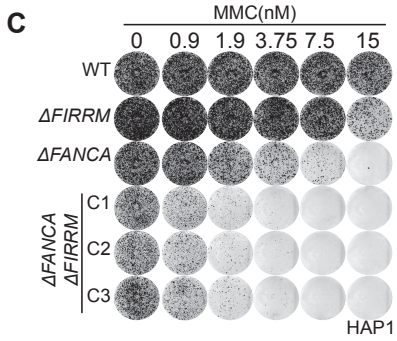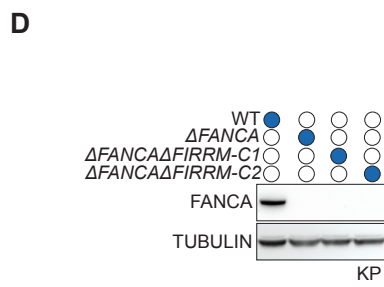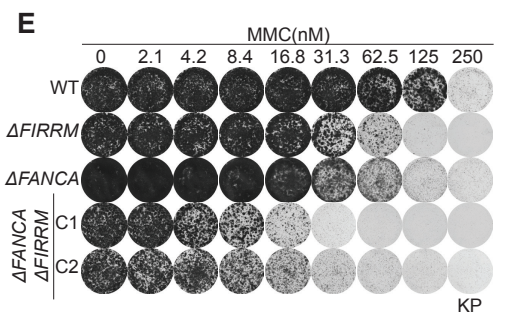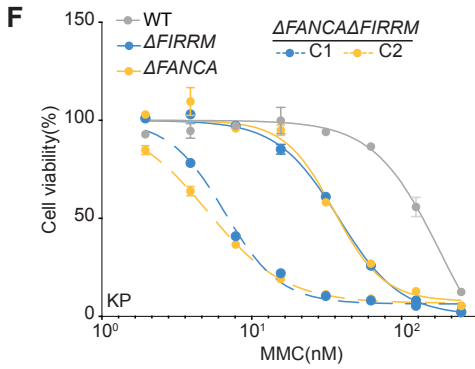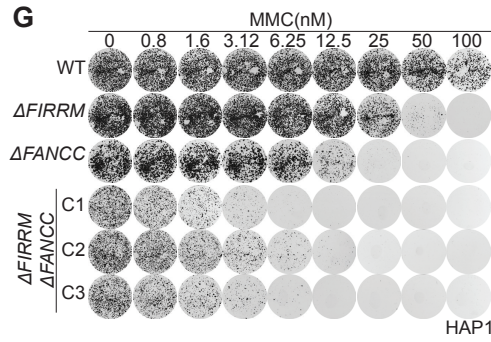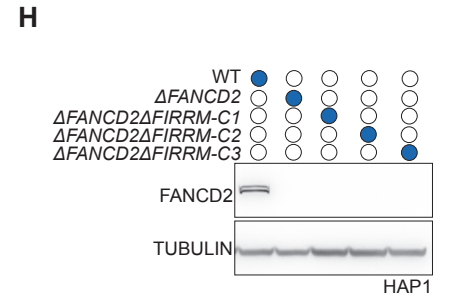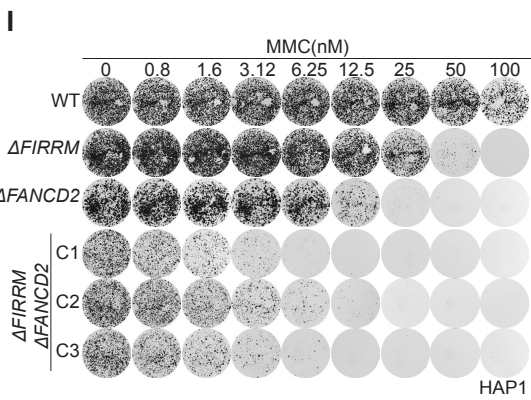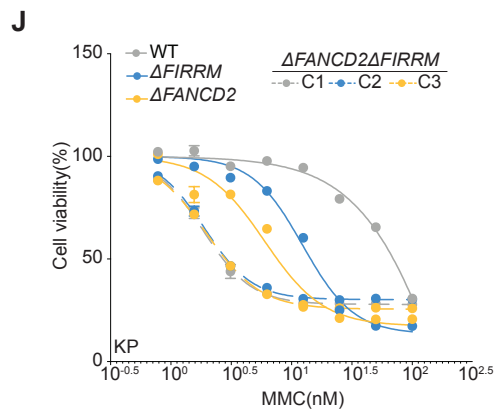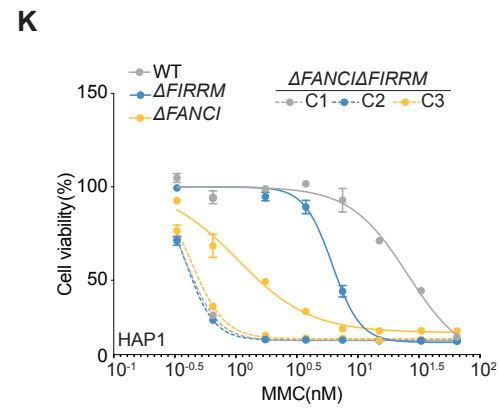

**Fig. S11. Loss of the FA pathway further exacerbates MMC sensitivity of FIRRM knockout cells.** (A) Scatter plot of the haploid genetic screen depicting the ratios (sense/total insertions) for each gene upon MMC treatment in two independent *FIRRM* knockout HAP1 clones. Genes that are differentially regulated compared to the wild-type untreated are depicted in dark blue and the DNA repair genes are highlighted in orange. (B) Heatmap showing the DNA repair genes that were identified in both, WT and *FIRRM* knockout cells and only in *FIRRM* knockout cells. (C) Clonogenic survival of HAP1 cells of indicated genotypes, quantification displayed in Fig. 5B. (D) Immunoblots confirming the loss of *FANCA* in single or *FIRRM-FANCA* double knockouts in KP cells. (E, F) Clonogenic survival and quantification of KP cells of indicated genotypes exposed to different doses of MMC. (G) Colony formation assay in *FANCC*, *FIRRM* single or double knockout HAP1 cells. Quantification is depicted in Fig. 5C. (H) Immunoblot confirming the loss of *FANCD2* in single and *FIRRM-FANCD2* double knockouts in HAP1 cells. (I) Clonogenic survival of HAP1 cells of indicated genotypes, quantification displayed in Fig 5D. (J) Quantification of KP cells depleted for *FANCD2* and/or *FIRRM* and exposed to various concentrations of MMC. (K) Clonogenic survival in HAP1 cells of indicated genotypes. All data are depicted as mean  $\pm$  s.e.m, normalized to untreated conditions. All images are representative of at least three independent biological replicates.



**A**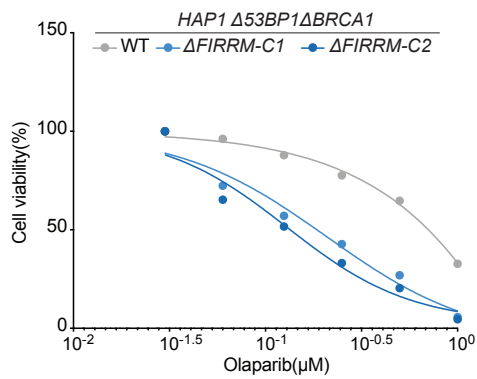**B**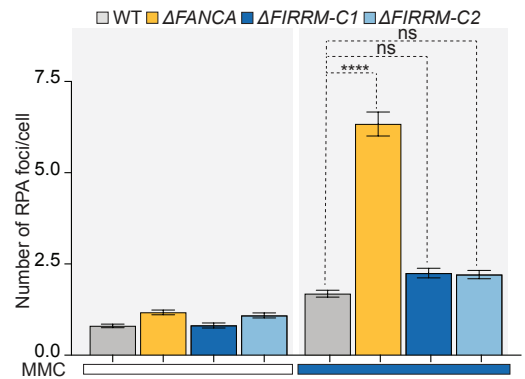**C**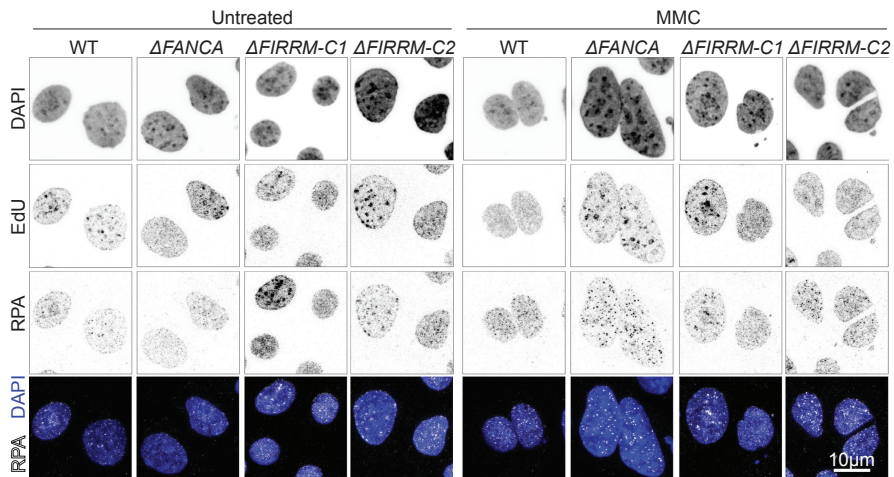**D**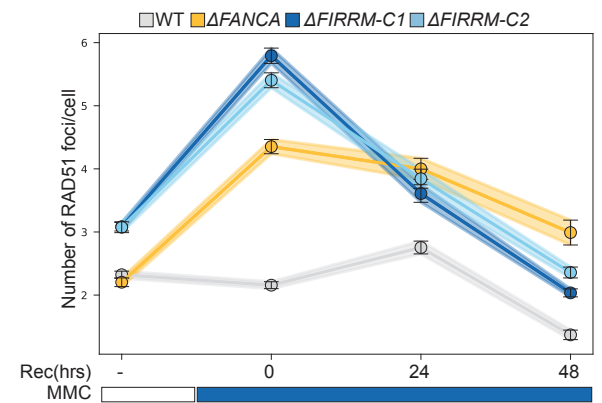**E**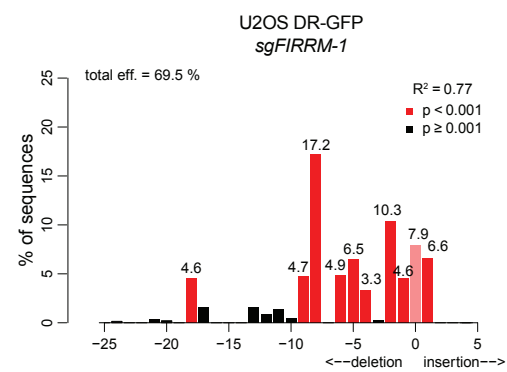**F**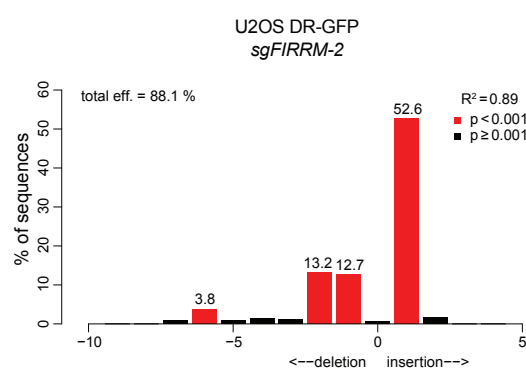**G**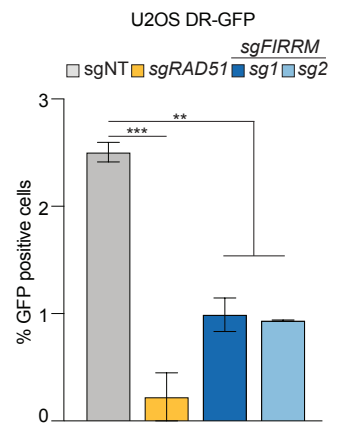

**Fig. S12. Loss of FIRRM does not impair initial steps of the HR pathway.** (A)  $\Delta 53BP1$   $\Delta BRC1$  HAP1 cells were exposed to indicated concentrations of olaparib and survival was quantified after 8 days. (B) Quantification of RPA foci in unchallenged conditions or after 24 hours of MMC treatment in KP cells. Data are displayed as mean  $\pm$  s.e.m.  $p$  value was calculated by the Mann-Whitney U test. \*\*\*\*  $p < 0.0001$ , ns not significant.  $n = 3$  (C) Representative images of KP cells of indicated genotypes unchallenged or treated with 100nM MMC and stained for RPA, EdU and DAPI. (D) Quantification of an immunofluorescent staining for RAD51 in HAP1 cells after treatment with 50nM MMC and subsequent recovery of indicated times. Data are displayed as mean  $\pm$  s.e.m.  $n = 2$  (E, F) Analysis of insertions and deletions in U2OS DR-GFP cells transduced with sgRNAs targeting *FIRRM* using the TIDE algorithm (44). (G) U2OS cells carrying the DR-GFP reporter construct were transduced with a non-targeting sgRNA or sgRNAs targeting *RAD51* or *FIRRM* and HR efficiency was assessed by flow cytometry. Data are depicted as mean  $\pm$  s.e.m. and significance was calculated by a two-tailed t-test, \*\*  $p < 0.01$ , \*\*\*  $p < 0.001$ ,  $n = 2$ .

**A**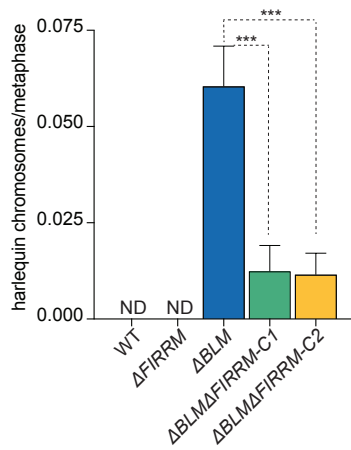**B**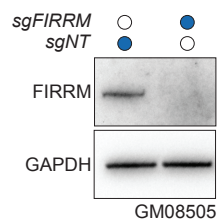**C**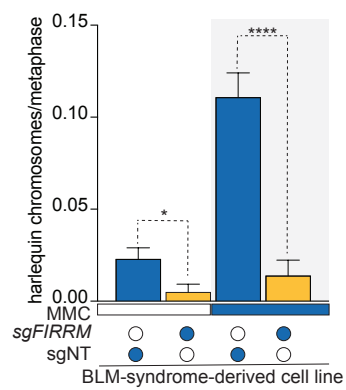**D**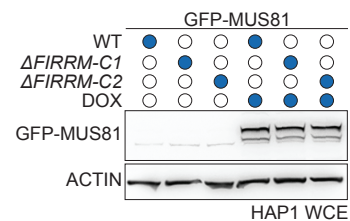**E**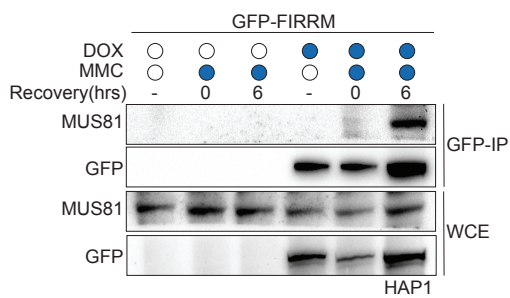**F**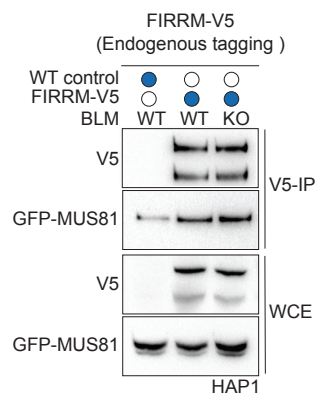

**Fig. S13. FIRRM depletion suppresses SCE formation.** (A) Number of harlequin chromosomes per metaphase (>5 SCEs per chromosome) in HAP1 cells of indicated genotypes upon 50nM MMC treatment for 24 hours. Data are depicted as mean  $\pm$  s.e.m., *p*-values were calculated using a two-tailed t-test. \*\*\* *p*<0.001, *n*=3 (B) Immunoblot confirming the depletion of FIRRM in GM08505 cells used in Fig. 6H and fig. S6C. (C) Number of harlequin chromosomes per metaphase in GM08505 cells transduced with the indicated sgRNAs and left untreated or exposed to 50nM MMC for 24 hours. Data are depicted as mean  $\pm$  s.e.m., *p*-values were calculated using a two-tailed t-test. \* *p*<0.05, \*\*\*\* *p*<0.0001, *n*=3 (D) Immunoblot of whole cell extracts (WCE) from wild-type or *FIRRM* knockout cells carrying doxycycline (DOX)-inducible GFP-tagged MUS81 used in Fig. 7E-G. (E) Doxycycline-inducible GFP-tagged FIRRM co-immunoprecipitation with endogenous MUS81 in untreated HAP1 cells or samples treated with 50nM MMC for 24 hours and allowed to recover for indicated times. (F) Co-immunoprecipitation of endogenously tagged FIRRM (C terminal V5 tag) with GFP-MUS81 in wild-type or BLM knockout cells treated with 50nM MMC for 24 hours and allowed to recover for an additional 6 hours.

A

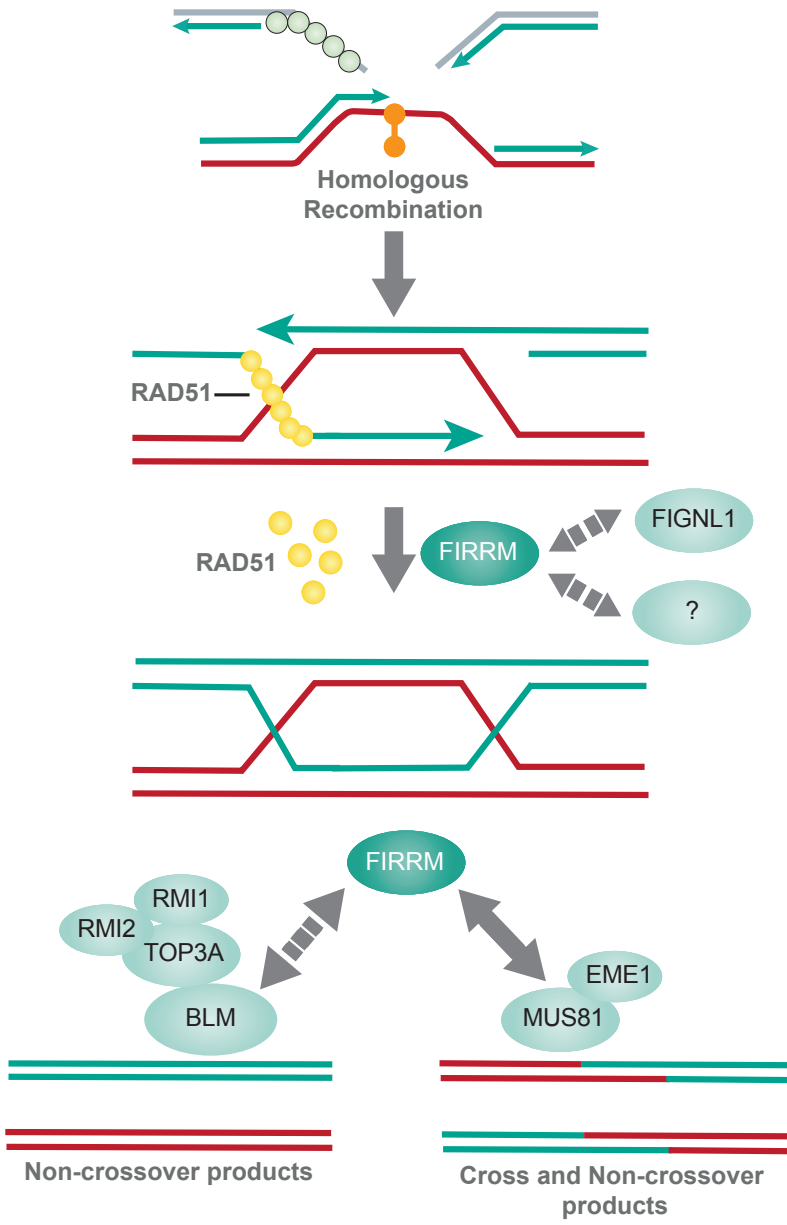

**Fig. S14. Proposed model for FIRRM functions in ICL response.** We suggest that FIRRM is involved at two steps during the ICL response. After initial processing of the ICL, RAD51 filaments might be dismantled by FIRRM either by interacting with FIGNL1 and/or other unknown factors. Further downstream, FIRRM may then act to recruit structure-specific endonucleases, such as MUS81, to modulate HR intermediate processing.

**Table S1. (separate file)**

List of 171 genes that were identified to cause sensitization to both MMC and ACT upon their inactivation.

**Table S2. (separate file)**

List of the 44 genes identified by intersecting ICL survival genes (MMC and ACT) with the  $\gamma$ H2AX negative regulators.

**Table S3. Single guide RNAs used in this study**

| Target genes - human                 | Sequence (5'-3')      |
|--------------------------------------|-----------------------|
| <i>FIRRM</i> guide 1                 | AACTGTATCTTCAGATACAC  |
| <i>FIRRM</i> guide 2                 | AGGTCTCAGAAACGACAACC  |
| <i>FIRRM</i> guide for V5-tag insert | AACGTTACATACATACTCTA  |
| <i>FIRRM</i> $\Delta$ DUF-1          | CAAGTATTGGCATGAAATGCA |
| <i>FIRRM</i> $\Delta$ DUF-2          | AGAGTCCCAGAGGATCCTCAA |
| <i>53BP1</i>                         | CAGAATCATCCTCTAGAACC  |
| <i>BLM</i>                           | CCAACACCACAAATCAGCAA  |
| <i>BRCA1</i>                         | TGTTACAAATCACCCCTCA   |
| <i>FANCA</i>                         | CGGGATGGTTGCCTCTAGCG  |
| <i>FANCC</i>                         | GCCAACAGTTGACCAATTGT  |
| <i>FANCD2</i> guide 1                | GGATTCCCAGCACGCTGATG  |
| <i>FANCD2</i> guide 2                | GACAGAAGATGCCTCCAGTA  |
| <i>FANCI</i>                         | GTATCCAGTTGGTGGAAATCG |
| <i>FIGNL1</i> guide 1                | GAAGACCCTGATGCACGCTG  |
| <i>FIGNL1</i> guide 2                | ATCAGTGGTAATCCATAAGG  |
| <i>MUS81</i>                         | AGAACAGTCCAGCCCCGCAG  |
| <i>MUS81</i> for Nt-dTAG knock-in    | AGGACCCGCCCTCGGGCTCA  |
| <i>RAD51</i>                         | CTATAGCTTCCCATTGACCG  |

| Target genes - mouse  | Sequence (5'-3')     |
|-----------------------|----------------------|
| <i>Firrm</i>          | GGAGCACAGAGGATATGACT |
| <i>Fanca</i>          | CAGCTGCAGCAAGAAAACAC |
| <i>Fancd2</i> guide 1 | TGAGCGAACACATAAGCGAA |
| <i>Fancd2</i> guide 2 | ATTCCCAGCATGCTAATGTG |
| <i>Fignl1</i> guide 1 | TCTTCAGACAATCATCAGTG |
| <i>Fignl1</i> guide 2 | TAGTAGTGCACGGTATGCAT |



**Table S4. PCR primers used to verify editing of loci targeted by the guide RNAs.**

## Human targets

| Target gene                  | forward                       | reverse                        |
|------------------------------|-------------------------------|--------------------------------|
| <i>FIRRM</i><br>guide 1      | AGGGGTCACATTCAGGATTTT         | TGCCATTGGATTTTATCACCTACT       |
| <i>FIRRM</i><br>guide 2      | AAGACCTGCCATGTGAACTG          | GGACTACGGTGTGGCAAGG            |
| <i>FIRRM</i><br>guide 3      | GTTCTGTGAAAAGAGGAAGAGAC<br>T  | AGGATCCCTGTGTCTGTCTCA          |
| <i>FIRRM</i><br><i>ADUF</i>  | CTCACCCCATGACATTTGGA          | AGAGTCCCAGAGGATCCTCAA          |
| <i>BLM</i>                   | AAATTAGTTTTGTAGAGTTGGGGG      | TTGCTCGCTTTCAGAGGAGG           |
| <i>FANCA</i>                 | GGCATTTTAAACAGCAAGTCTTTG<br>G | ATACTGAGCAAACCTCTAACAGGGA<br>A |
| <i>FANCC</i>                 | ACTAAACAAGAAGCATTACGTT<br>CC  | CAAACCTACACACACATACATGGA<br>C  |
| <i>FANCI</i>                 | CTTTTTCAAAGCCCTTAACCATTG<br>C | CCCTCAACAATTACAAACCCTCA<br>A   |
| <i>FIGNL</i><br>1 guide<br>1 | TCTGGCACCATTGATGCACT          | ATGTCTGGCCTCAACATGGG           |
| <i>FIGNL</i><br>1 guide<br>2 | TCTGACAATGTTGAATCTGGGT        | GCAGCAGGAAAACAAGACTGG          |
| <i>MUS81</i>                 | GCCCTTGGCTTTTAAGCTCC          | TCACTTCTACCATGCGCTGC           |

## Mouse targets

| Target gene              | forward                   | reverse               |
|--------------------------|---------------------------|-----------------------|
| <i>FIRRM</i><br>guide 1  | ACTTTTACACATAAACAAGAGAGCA | ATAGCAGCGGGGGATTACTT  |
| <i>Fanca</i>             | GCGGTGGGCAGTCTATTACA      | TTGCTCGGCAGTTGTGACTT  |
| <i>Fandc2</i><br>guide 1 | AGGAGCTAGGACCCGTGTT       | CAAGCAGGGGCCTGTAGCAA  |
| <i>Fandc2</i><br>guide 2 | ATAATGTTCTCCCTGCAGGACC    | GTGTCCCAGCCTTTATGTTCC |
| <i>Figl1</i><br>guide 1  | GGCCATCAATCCCAGCATACA     | TCCCTCACCTACCCACTTAGA |

|                         |                      |                      |
|-------------------------|----------------------|----------------------|
| <i>Fig11</i><br>guide 2 | TTGACATGGAGACGTCCAGC | GCGTCTTCAGAACCTCCACA |
|-------------------------|----------------------|----------------------|

**Table S5. Antibodies used in this study**

| <b>Antibody</b>  | <b>Species</b> | <b>Company</b>            | <b>Catalog number</b> | <b>Technique</b>           | <b>Dilution</b>          |
|------------------|----------------|---------------------------|-----------------------|----------------------------|--------------------------|
| $\beta$ -actin   | mouse          | Sigma                     | A5441                 | Western blot               | 1:2000                   |
| $\beta$ -catenin | mouse          | BD Biosciences            | 610154                | Western blot               | 1:2000                   |
| $\beta$ -tubulin | rabbit         | Cell Signaling            | 2148S                 | Western blot               | 1:1000                   |
| $\gamma$ H2AX    | mouse          | Merck                     | 05-636                | Western blot<br>IF<br>FACS | 1:1000<br>1:500<br>1:500 |
| 53BP1            | rabbit         | Bethyl                    | A300-272A             | IF                         | 1:1000                   |
| BLM              | rabbit         | abcam                     | ab2179                | Western blot               | 1:1000                   |
| FIRRM            | rabbit         | Thermo Fisher             | PA5-54884             | Western blot               | 1:500                    |
| Cyclin B1        | mouse          | Santa Cruz                | sc-245                | IF                         | 1:400                    |
| FANCA            | rabbit         | abcam                     | ab272392              | Western blot               | 1:1000                   |
| FANCD2           | rabbit         | Novus                     | NB100-182             | Western blot<br>IF         | 1:1000<br>1:500          |
| FIGNL1           | rabbit         | Atlas antibodies          | HPA055542             | Western blot               | 1:1000                   |
| GAPDH            | mouse          | GeneTex                   | GTX627408             | Western blot               | 1:2000                   |
| GFP              | mouse          | Santa Cruz                | sc-9996               | Western blot               | 1:1000                   |
| GFP              | goat           | abcam                     | ab6673                | Western blot               | 1:1000                   |
| HA               | mouse          | Biologend                 | 901513                | Western blot               | 1:1000                   |
| H3               | rabbit         | Thermo Fisher             | PA5-31954             | Western blot               | 1:2000                   |
| MUS81            | mouse          | abcam                     | ab14387               | Western blot               | 1:1000                   |
| PCNA             | mouse          | Santa Cruz                | sc-56                 | Western blot               | 1:1000                   |
| RAD51            | rabbit         | abcam                     | ab133534              | Western blot               | 1:1000                   |
| RAD51            | mouse          | Genetex                   | GTX70230              | IF                         | 1:250                    |
| RPA32            | mouse          | abcam                     | ab2175                | IF                         | 1:500                    |
| V5-Tag           | mouse          | ThermoFisher eBioscience™ | 14-6796-82            | Western blot<br>IF         | 1:1000<br>1:400          |
| V5-Tag           | rabbit         | Cell Signaling            | 13202S                | Western blot<br>IF         | 1:1000<br>1:500          |

**Table S6. Gene editing events in HAP1 knockout clones (sgRNAs are highlighted in bold).**

| Gene                      | Indel(bp)                | Target sequence                                                                                                                                                                                                            |
|---------------------------|--------------------------|----------------------------------------------------------------------------------------------------------------------------------------------------------------------------------------------------------------------------|
| FANCA<br>(WT<br>sequence) |                          | TTCTCTCAGCCGGGATGGTTGCCTCTAGCGTGGGACAGAT                                                                                                                                                                                   |
| ΔFANCA                    | -7                       | TTCTCTCAGCCGGGATGGTTGC - - - - -GTGGGACAGAT                                                                                                                                                                                |
| ΔFIRRM<br>ΔFANCA-<br>C1   | -11                      | TTCTCTCAGCCGGGATGGTTG - - - - - GGACAGAT                                                                                                                                                                                   |
| ΔFIRRM<br>ΔFANCA-<br>C2   | -7                       | TTCTCTCAGCCGGGATGGTTGC - - - - - GTGGGACAGAT                                                                                                                                                                               |
| ΔFIRRM<br>ΔFANCA-<br>C3   | -16                      | TTCTCTCAGCCGGGATGG - - - - - ACAGAT                                                                                                                                                                                        |
|                           |                          |                                                                                                                                                                                                                            |
| FANCC<br>(WT<br>sequence) |                          | AAGATTCCCCACAATTGGTCAACTGTTGGCAAAGCTTGT                                                                                                                                                                                    |
| ΔFANCC                    | +1                       | AAGATTCCCCACAATTGGTCAACTGTTGGCAAAGCTTGT<br>T                                                                                                                                                                               |
| ΔFIRRM<br>ΔFANCC-<br>C1   | -2093,<br>-53 in<br>exon | AAGATTCCCCAC – (2093bp) - AGGGTCTTGA                                                                                                                                                                                       |
| ΔFIRRM<br>ΔFANCC-<br>C2   | +6, -23                  | <b>AAGACAACAA</b> - - - - -<br>GCAAAGCTTGT                                                                                                                                                                                 |
| ΔFIRRM<br>ΔFANCC-<br>C3   | +29                      | <b>AAGATTCCCCACATCAGAAAAAGCCAAGACCCCATATCT<br/>CCATTGGTCAACTGTTGGCAAAGCTTGT</b>                                                                                                                                            |
| FANCI<br>(WT<br>sequence) |                          | CACTTGTTGTATCCAGTTGGTGGAAATCGGGGATTTGCAG                                                                                                                                                                                   |
| ΔFANCI                    | -13                      | CACTTGTTGTATCC - - - - - GGGGATTTGCAG                                                                                                                                                                                      |
| ΔFIRRM<br>ΔFANCI-<br>C1   | +158                     | CACTTGTTGTATCCAGTTGGTGGAA<br>ATCGGAGGATTTGCAGAAAGAGTTACTGTCTGAGATCATAA<br>TGATTACTGATGCTGCGAAGTAATATGTGCACCACTGGAATT<br>TTTATATGATCATAGATTTTCGAGGGTTAGCTTTGGATTGAG<br>GGAACGAGTTGTTAGACAGGCAGAATACAAAGATCGGGGG<br>ATTTGCAG |
| ΔFIRRM<br>ΔFANCI-<br>C2   | -7                       | CACTTGTTGTATCCAGTTGGTGG - - - - - GGATTTGCAG                                                                                                                                                                               |

|                            |     |                                            |
|----------------------------|-----|--------------------------------------------|
| ΔFIRRM<br>ΔFANCI-<br>C3    | -13 | CACTTGTTGTAT ----- TCGGGGGATTTGCAG         |
| FIGNL1<br>(WT<br>sequence) |     | CCACCAACCTCAGCGTGCATCAGGGTCTTCATATGGTGGT   |
| ΔFIGNL1-<br>1              | -2  | CCACCAACCTC -- CGTGCATCAGGGTCTTCATATGGTGGT |
| ΔFIGNL1-<br>2              | -5  | CCACCAACC -- GTGCATCAGGGTCTTCATATGGT       |
| ΔFIRRM<br>ΔFIGNL1-<br>C1   | -13 | CCACCA ----- TCAGGGTCTTCATATGGTGGT         |
| ΔFIRRM<br>ΔFIGNL1-<br>C2   | -11 | CCACCAACCTCAG ----- GGTCTTCATATGGTGGT      |
| ΔFIRRM<br>ΔFIGNL1-<br>C3   | -25 | GCAAAAAAAG----- GGTCTTCATAT<br>GGTGGT      |

**Table S7. Gene editing events in KP knockout clones.**

|                          |               |                                                                                                                                 |
|--------------------------|---------------|---------------------------------------------------------------------------------------------------------------------------------|
| FIRRM                    | Guide 1       | AGTAGATGAGAATAACGCTTTGATAATGGTAGGAGGTGA<br>G                                                                                    |
| ΔFIRRM-1                 | +116/+<br>7   | AGTAGATGAGAATAACGCTTTGATAATG – (+116)- GTGAG<br>AGTAGATGAGAATAACGCTTTGATAATGTGAGCAAGTGAG                                        |
| ΔFIRRM-2                 | -154/-<br>80  | – (-154)- AGGAGGTGAG<br>- (-80) - AGGAGGTGAG                                                                                    |
| ΔFIRRM<br>ΔFANCD2<br>-C1 | +1/+1         | CTAAAGACCGTTCGGCTTATGTGTTTCGCTCACATTCCTAAC<br>CTAAAGACCGTTCGGCTTATGTGTTTCGCTCACATTCCTAAC                                        |
| ΔFIRRM<br>ΔFANCD2<br>-C2 | +1/-2/-<br>36 | ATCCTAGGGGATTCCCAGCATGCTAATGGTGGGGAAAGAG<br>C<br>ATCCTAGGGGATTCCCAGCATGCTA - - GTGGGGAAAGAGC<br>ATCCTAGGG – (-36) - TGGGTAAACAC |
| ΔFIRRM<br>ΔFANCD2<br>-C3 | +1/-2         | ATCCTAGGGGATTCCCAGCATGCTAATGGTGGGGAAAGAG<br>C<br>ATCCTAGGGGATTCCCAGCATGCTA - - GTGGGGAAAGAGC                                    |
